# Supplementary material for: Hydrogen sorption efficiency of titanium decorated calix[4]pyrroles
Source: Royal Society of Chemistry journal article supplement (doi:10.1039/c7cp06781j), 2017-01-01
Supplement: c7cp06781j1.pdf [file c7cp06781j1.pdf]

## **Hydrogen Sorption Efficiency of Titanium Decorated Calix[4]pyrroles**

Sandeep Kumar, Rohit Y. Sathe, and T. J. Dhilip Kumar\*  
Department of Chemistry  
Indian Institute of Technology Ropar  
Rupnagar 140001, India  
\*Email- dhilip@iitrpr.ac.in

**Figure S1:** Optimized geometries: (a) MeCXP, (b) MeCXP-Ti<sub>4</sub>, (c) MeCXP-Ti<sub>4</sub>-4H<sub>2</sub>, (d) MeCXP-Ti<sub>4</sub>-8H<sub>2</sub>, (e) MeCXP-Ti<sub>4</sub>-12H<sub>2</sub> and (f) MeCXP-Ti<sub>4</sub>-16H<sub>2</sub> systems.

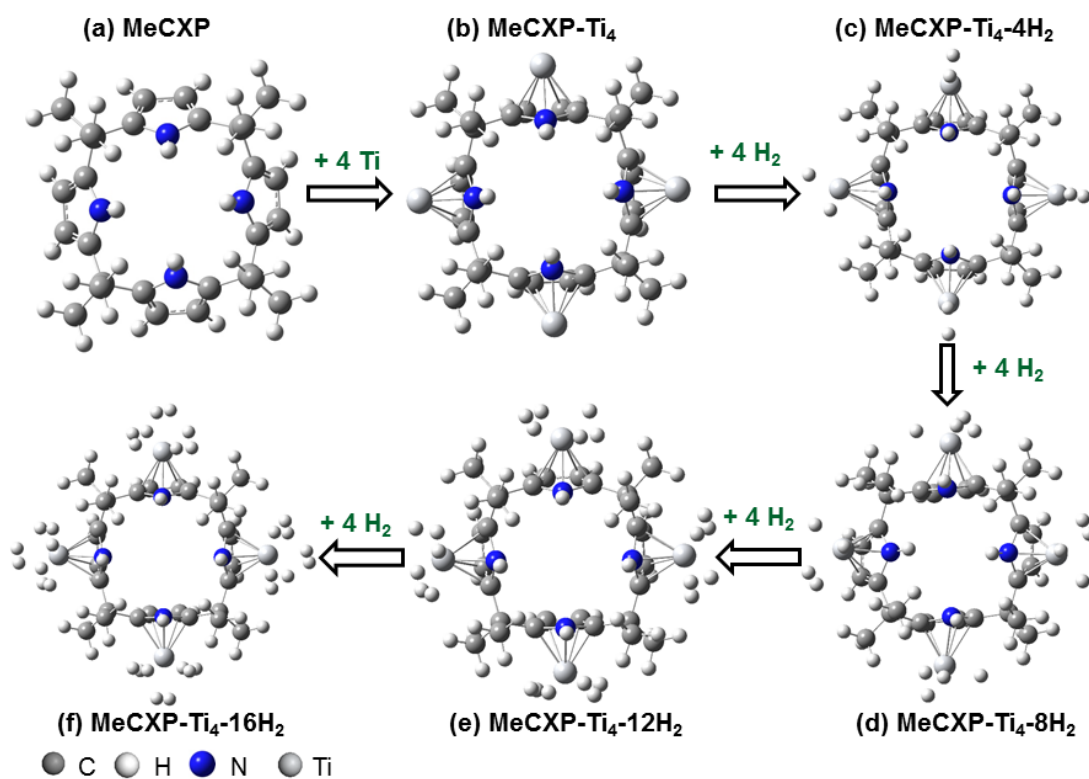

**Figure S2:** Two pyrrole rings of each CXP bonded with Ti metal as a sandwich type structure with 3 physisorbed H<sub>2</sub> molecule on sandwiched Ti.

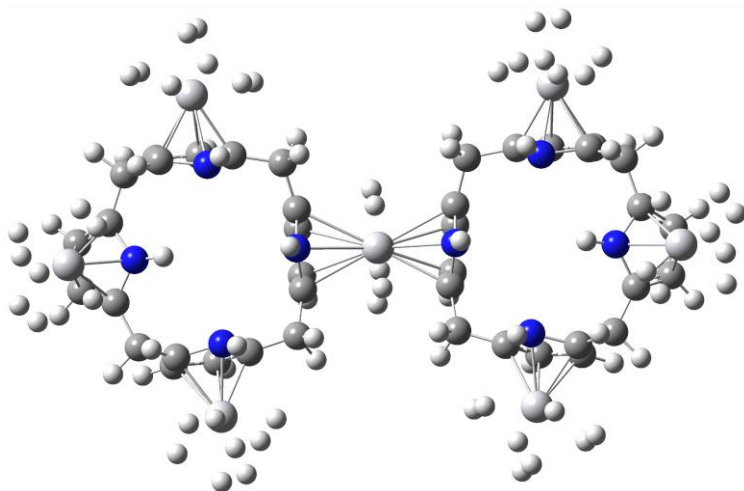

**Figure S3:** Top and bottom views of charge generation of electrostatic potential map of MeCXP, MeCXP-Ti<sub>4</sub> and MeCXP-Ti<sub>4</sub>-nH<sub>2</sub> systems (n = 4, 8, 12 and 16). The units used in e/Å<sup>3</sup>

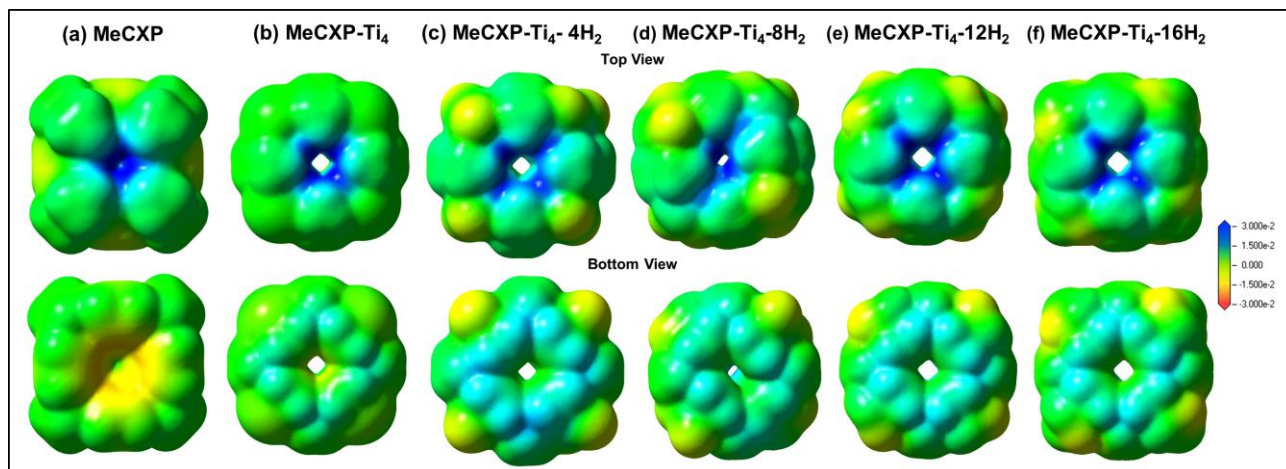

**Figure S4:** Hirshfeld Charges of Ti, chemisorbed hydrogen (Hc) and physisorbed hydrogen (Hp) of MeCXP-Ti<sub>4</sub>-nH<sub>2</sub> system (where n = 4, 8, 12 and 16).

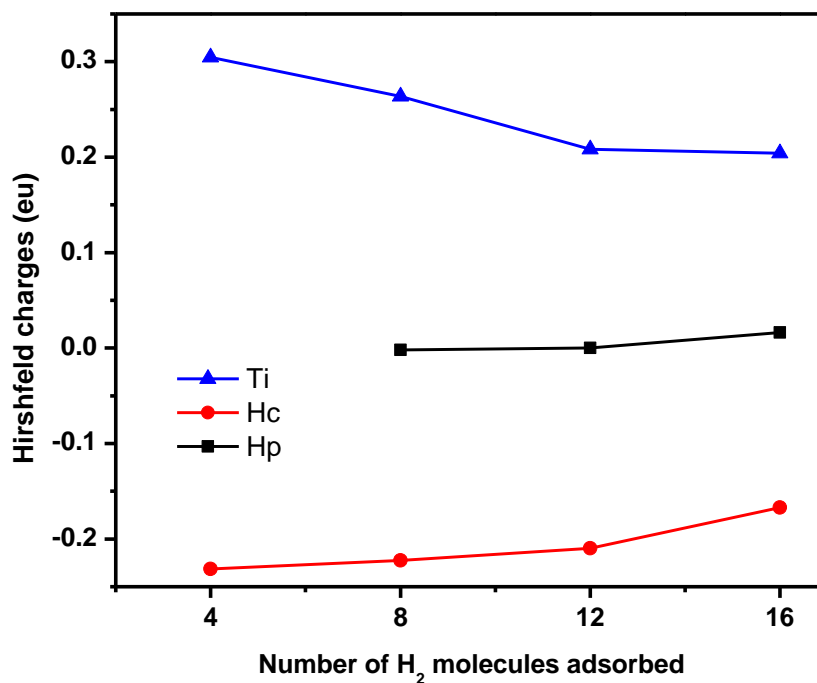

**Figure S5:** Snap-shots of MD simulation of H<sub>2</sub> trapped on MeCXP-Ti<sub>4</sub>-16H<sub>2</sub> at the temperatures of (a) 200 K, (b) 273 K, (c) 373K, and (d) 473 K.

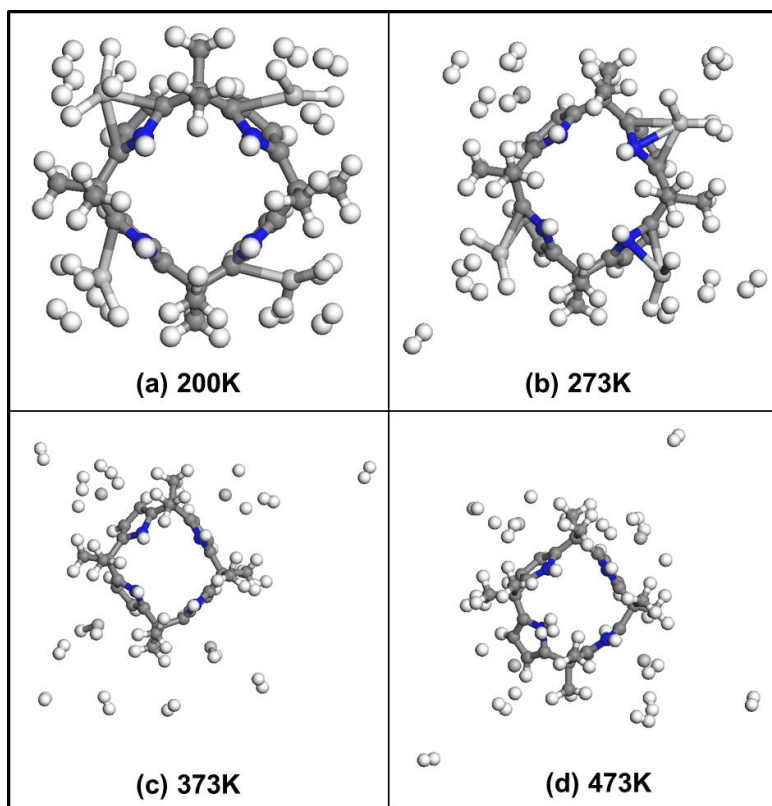

**Table S1:** The bond distance between Ti metal and center of pyrrole ring of MeCXP ring (Ti-R<sub>c</sub>), Ti and chemisorbed hydrogen (Ti-H<sub>c</sub>), Ti and physisorbed hydrogen (Ti-H<sub>p</sub>) chemisorbed hydrogen (H<sub>c</sub>-H<sub>c</sub>) and physisorbed hydrogen distance (H<sub>p</sub>-H<sub>p</sub>). These are average bond distances measured in angstrom (Å).

| System                                  | Ti-R <sub>c</sub> | Ti-H <sub>c</sub> | Ti-H <sub>p</sub> | H <sub>c</sub> -H <sub>c</sub> | H <sub>p</sub> -H <sub>p</sub> |
|-----------------------------------------|-------------------|-------------------|-------------------|--------------------------------|--------------------------------|
| MeCXP-Ti <sub>4</sub>                   | 1.898             | -                 | -                 | -                              | -                              |
| MeCXP-Ti <sub>4</sub> -4H <sub>2</sub>  | 1.892             | 1.764             | -                 | 3.044                          | -                              |
| MeCXP-Ti <sub>4</sub> -8H <sub>2</sub>  | 1.923             | 1.750             | 1.884             | 2.900                          | 0.818                          |
| MeCXP-Ti <sub>4</sub> -12H <sub>2</sub> | 1.943             | 1.754             | 1.893             | 3.090                          | 0.810                          |
| MeCXP-Ti <sub>4</sub> -16H <sub>2</sub> | 1.943             | 1.748             | 1.931             | 3.256                          | 0.806                          |

**Table S2:** Calculated hardness ( $\eta$ ), electrophilicity ( $\omega$ ), HOMO-LUMO energy gap ( $E_g$ ) and average adsorption energy ( $E_{ad}$ ), sequential desorption energy ( $E_{de}$ ) of all hydrogen trapped MeCXP-Ti<sub>4</sub> systems. All these calculated energies provided in eV. The hydrogen wt % is also given.

| System                                  | $\eta$ | $\omega$ | $E_g$ | $E_{ad}$ | $E_{de}$ | H wt % |
|-----------------------------------------|--------|----------|-------|----------|----------|--------|
| MeCXP-Ti <sub>4</sub>                   | 1.57   | 1.90     | 1.92  | -        | -        | -      |
| MeCXP-Ti <sub>4</sub> -4H <sub>2</sub>  | 4.23   | 1.28     | 2.31  | 1.91     | 1.91     | 7.06   |
| MeCXP-Ti <sub>4</sub> -8H <sub>2</sub>  | 4.56   | 1.16     | 2.92  | 1.12     | 0.33     | 8.24   |
| MeCXP-Ti <sub>4</sub> -12H <sub>2</sub> | 4.73   | 0.97     | 2.89  | 0.84     | 0.28     | 9.39   |
| MeCXP-Ti <sub>4</sub> -16H <sub>2</sub> | 5.26   | 0.58     | 3.33  | 0.68     | 0.18     | 10.51  |

**Table S3:** Calculated Adsorption energy of CXP-Ti<sub>4</sub>-nH<sub>2</sub> (n = 4, 8, 12 and 16 H<sub>2</sub>)

| S. No. | System                                | M06/6-311++G(d,p)      | M06/6-311G(d,p)        |
|--------|---------------------------------------|------------------------|------------------------|
|        |                                       | Adsorption Energy (eV) | Adsorption Energy (eV) |
| 1      | CXP-Ti <sub>4</sub> -4H <sub>2</sub>  | 1.71                   | 1.87                   |
| 2      | CXP-Ti <sub>4</sub> -8H <sub>2</sub>  | 1.16                   | 1.12                   |
| 3      | CXP-Ti <sub>4</sub> -12H <sub>2</sub> | 0.98                   | 0.87                   |
| 4      | CXP-Ti <sub>4</sub> -16H <sub>2</sub> | 0.83                   | 0.71                   |

**Table S4:** Values of various bond moments for CXP their Ti decorated derivatives and H<sub>2</sub> adsorbed derivatives done by M06/6-311G(d,p) method

|                                          |               |               |               |
|------------------------------------------|---------------|---------------|---------------|
| <b>1. CXP</b>                            |               |               |               |
| Dipole moment (Debye):                   |               |               |               |
| X= 0.0000                                | Y= -0.0000    | Z= -4.5969    | Total= 4.5969 |
| Quadrupole moment (Debye-Ang):           |               |               |               |
| XX= -144.2246                            | YY= -144.2246 | ZZ= -128.9228 |               |
| XY= 0.0000                               | XZ= 0.0000    | YZ= 0.0000    |               |
| Traceless Quadrupole moment (Debye-Ang): |               |               |               |
| XX= -5.1006                              | YY= -5.1006   | ZZ= 10.2012   |               |

|                                                |                  |                 |                 |
|------------------------------------------------|------------------|-----------------|-----------------|
| XY= 0.0000                                     | XZ= 0.0000       | YZ= 0.0000      |                 |
| Octapole moment (Debye-Ang <sup>2</sup> ):     |                  |                 |                 |
| XXX= -0.0000                                   | YYY= 0.0000      | ZZZ= -29.9432   | XYY= -0.0000    |
| XXY= 0.0000                                    | XXZ=19.6424      | XZZ= -0.0000    | YZZ= 0.0000     |
| YYZ= 19.6424                                   | XYZ= 0.0000      |                 |                 |
| Hexadecapole moment (Debye-Ang <sup>3</sup> ): |                  |                 |                 |
| XXXX= -5212.1144                               | YYYY= -5212.1144 | ZZZZ= -623.5241 | XXXY= 0.0000    |
| XXXZ= 0.0000                                   | YYYX= -0.0000    | YYYZ= 0.0000    | ZZZX= -0.0000   |
| ZZZY= 0.0000                                   | XXYY= -1479.5437 | XXZZ= -871.2691 | YYZZ= -871.2691 |
| XXYZ= -0.0000                                  | YYXZ= -0.0000    | ZZXY= -0.0000   |                 |

## 2. CXP-Ti<sub>4</sub>

Dipole moment (Debye):

X= -0.0002      Y= -1.2864      Z= 0.4568      Total= 1.3651

Quadrupole moment (Debye-Ang):

XX= -238.6247      YY= -235.6141      ZZ= -211.0611  
 XY= 0.0001      XZ= 0.0002      YZ= -1.1697

Traceless Quadrupole moment (Debye-Ang):

XX= -10.1914      YY= -7.1808      ZZ= 17.3722  
 XY= 0.0001      XZ= 0.0002      YZ= -1.1697

Octapole moment (Debye-Ang<sup>2</sup>):

XXX= -0.0094      YYY= -47.8239      ZZZ= 29.6013      XYY= 0.0017  
 XXY= -3.2849      XXZ=60.2457      XZZ= -0.0006      YZZ= 3.4005  
 YYZ= -2.3641      XYZ= 0.0055

Hexadecapole moment (Debye-Ang<sup>3</sup>):

XXXX= -11393.4657      YYYY= -10183.0729      ZZZZ= -1407.6024      XXXY= -0.0660  
 XXXZ= 0.0100      YYYX= 0.0418      YYYZ= -3.1993      ZZZX= 0.0035  
 ZZZY= -12.1136      XXYY= -3440.3796      XXZZ= -1949.4263      YYZZ= -1889.308  
 XXYZ= -2.4789      YYXZ= 0.0002      ZZXY= 0.0117

## 3. CXP-Ti<sub>4</sub>-4H<sub>2</sub>

Dipole moment (Debye):

X= -1.1044      Y= -0.1555      Z= 0.8288      Total= 1.3895

Quadrupole moment (Debye-Ang):

XX= -259.1665      YY= -247.2177      ZZ= -232.6586  
 XY= -8.5422      XZ= -6.8752      YZ= 8.6472

Traceless Quadrupole moment (Debye-Ang):

XX= -12.8189      YY= -0.8701      ZZ= 13.6890

|                                                |                  |                  |                  |
|------------------------------------------------|------------------|------------------|------------------|
| XY= -8.5422                                    | XZ= -6.8752      | YZ=              | 8.6472           |
| Octapole moment (Debye-Ang <sup>2</sup> ):     |                  |                  |                  |
| XXX= -0.7348                                   | YYY= 10.5589     | ZZZ= 29.3243     | XYY= -10.5381    |
| XXY= -5.6995                                   | XXZ= 138.4682    | XZZ= -21.9685    | YZZ= 11.4912     |
| YYZ= -94.7326                                  | XYZ= 4.3268      |                  |                  |
| Hexadecapole moment (Debye-Ang <sup>3</sup> ): |                  |                  |                  |
| XXXX= -12806.0334                              | YYYY= -8515.9963 | ZZZZ= -2415.9578 | XXXY= -380.2534  |
| XXXZ= -11.1839                                 | YYYX= -15.6216   | YYYZ= 309.7274   | ZZZX= -65.3171   |
| ZZZY= 71.0855                                  | XXYY= -2822.6700 | XXZZ= -2285.4728 | YYZZ= -1722.3287 |
| XXYZ= 46.2790                                  | YYXZ= -154.2383  | ZZXY= 46.9036    |                  |

#### 4. CXP-Ti<sub>4</sub>-8H<sub>2</sub>

Dipole moment (Debye):

X= 0.6957                      Y= -0.1282                      Z= 6.7497                      Total= 6.7866

Quadrupole moment (Debye-Ang):

XX= -257.4327                      YY= -272.7159                      ZZ= -234.2889  
 XY= 0.2999                      XZ= -6.1497                      YZ= 3.4647

Traceless Quadrupole moment (Debye-Ang):

XX= -2.6202                      YY= -17.9034                      ZZ= 20.5236  
 XY= 0.2999                      XZ= -6.1497                      YZ= 3.4647

Octapole moment (Debye-Ang<sup>2</sup>):

XXX= -8.2054                      YYY= 8.5168                      ZZZ= 71.9940                      XYY= 21.4817  
 XXY= -5.7060                      XXZ= 192.9223                      XZZ= 6.9364                      YZZ= -2.6576  
 YYZ= 65.3203                      XYZ= 14.3493

Hexadecapole moment (Debye-Ang<sup>3</sup>):

XXXX= -12891.0612                      YYYY= -12419.2490                      ZZZZ= -1638.8083                      XXXY= -371.9640  
 XXXZ= -252.1116                      YYYX= 207.6648                      YYYZ= 33.5899                      ZZZX= 27.6507  
 ZZZY= 32.5996                      XXYY= -3454.5025                      XXZZ= -2444.7878                      YYZZ= -2203.4797  
 XXYZ= -10.9551                      YYXZ= -57.5560                      ZZXY= 57.9134

#### 5. CXP-Ti<sub>4</sub>-12H<sub>2</sub>

Dipole moment (Debye):

X= 0.0006                      Y= -0.0002                      Z= 3.6625                      Total= 3.6625

Quadrupole moment (Debye-Ang):

XX= -287.8316                      YY= -283.6309                      ZZ= -227.0349  
 XY= -2.2813                      XZ= -0.0060                      YZ= -0.0004

Traceless Quadrupole moment (Debye-Ang):

|                                                |                   |                  |                  |
|------------------------------------------------|-------------------|------------------|------------------|
| XX= -21.6658                                   | YY= -17.4651      | ZZ= 39.1309      |                  |
| XY= -2.2813                                    | XZ= -0.0060       | YZ= -0.0004      |                  |
| Octapole moment (Debye-Ang <sup>2</sup> ):     |                   |                  |                  |
| XXX= -0.0114                                   | YYY= -0.0064      | ZZZ= 47.7425     | XYY= -0.0006     |
| XXY= 0.0008                                    | XXZ= 124.4033     | XZZ= 0.0128      | YZZ= -0.0038     |
| YYZ= 38.8859                                   | XYZ= 18.1135      |                  |                  |
| Hexadecapole moment (Debye-Ang <sup>3</sup> ): |                   |                  |                  |
| XXXX= -14362.7575                              | YYYY= -13775.8665 | ZZZZ= -1462.5859 | XXXY= -574.5058  |
| XXXZ= -0.2183                                  | YYYX= 347.7983    | YYYZ= -0.0489    | ZZZX= -0.0874    |
| ZZZY= -0.0226                                  | XXYY= -4130.0134  | XXZZ= -2325.6492 | YYZZ= -2230.0497 |
| XXYZ= -0.0470                                  | YYXZ= -0.0324     | ZZXY= 72.2428    |                  |
| <b>6. CXP-Ti<sub>4</sub>-16H<sub>2</sub></b>   |                   |                  |                  |
| Dipole moment (Debye):                         |                   |                  |                  |
| X= 0.0001                                      | Y= -0.0010        | Z= 2.0301        | Total= 2.0301    |
| Quadrupole moment (Debye-Ang):                 |                   |                  |                  |
| XX= -279.5020                                  | YY= -273.7935     | ZZ= -233.5579    |                  |
| XY= -3.0027                                    | XZ= 0.0008        | YZ= 0.0001       |                  |
| Traceless Quadrupole moment (Debye-Ang):       |                   |                  |                  |
| XX= -17.2175                                   | YY= -11.5091      | ZZ= 28.7266      |                  |
| XY= -3.0027                                    | XZ= 0.0008        | YZ= 0.0001       |                  |
| Octapole moment (Debye-Ang <sup>2</sup> ):     |                   |                  |                  |
| XXX= 0.0008                                    | YYY= -0.0384      | ZZZ= 40.7359     | XYY= 0.0059      |
| XXY= -0.0012                                   | XXZ= 61.2227      | XZZ= -0.0015     | YZZ= -0.0020     |
| YYZ= 17.5744                                   | XYZ= 15.9098      |                  |                  |
| Hexadecapole moment (Debye-Ang <sup>3</sup> ): |                   |                  |                  |
| XXXX= -14149.5349                              | YYYY= -13392.7514 | ZZZZ= -1514.4888 | XXXY= -495.0648  |
| XXXZ= 0.0543                                   | YYYX= 238.1200    | YYYZ= 0.0924     | ZZZX= 0.0352     |
| ZZZY= 0.0736                                   | XXYY= -4538.7632  | XXZZ= -2429.9725 | YYZZ= -2389.3300 |
| XXYZ= 0.0363                                   | YYXZ= 0.0152      | ZZXY= 77.2319    |                  |

**Table S5: Values of various bond moments for MeCXP, their Ti decorated derivatives and H<sub>2</sub> adsorbed derivatives done by M06/6-311G(d,p) method**

|                        |            |           |               |
|------------------------|------------|-----------|---------------|
| <b>1. MeCXP</b>        |            |           |               |
| Dipole moment (Debye): |            |           |               |
| X= -0.0001             | Y= -0.0002 | Z= 4.3522 | Total= 4.3522 |



|                                                |                  |                  |                  |
|------------------------------------------------|------------------|------------------|------------------|
| Quadrupole moment (Debye-Ang):                 |                  |                  |                  |
| XX= -194.4501                                  | YY= -194.4498    | ZZ= -188.0941    |                  |
| XY= -0.0000                                    | XZ= -0.0003      | YZ= -0.0006      |                  |
| Traceless Quadrupole moment (Debye-Ang):       |                  |                  |                  |
| XX= -2.1188                                    | YY= -2.1184      | ZZ= 4.2372       |                  |
| XY= -0.0000                                    | XZ= -0.0003      | YZ= -0.0006      |                  |
| Octapole moment (Debye-Ang <sup>2</sup> ):     |                  |                  |                  |
| XXX= 0.0013                                    | YYY= 0.0028      | ZZ= 8.6033       | XYY= -0.0002     |
| XXY= -0.0005                                   | XXZ= -11.0259    | XZZ= -0.0017     | YZZ= -0.0033     |
| YYZ= -11.0237                                  | XYZ= -0.0000     |                  |                  |
| Hexadecapole moment (Debye-Ang <sup>3</sup> ): |                  |                  |                  |
| XXXX= -8524.1792                               | YYYY= -8524.1230 | ZZZZ= -1531.3808 | XXXY= 0.6606     |
| XXXZ= 0.0035                                   | YYYYX= -0.6605   | YYYZ= -0.0105    | ZZZX= 0.0131     |
| ZZZY= 0.0107                                   | XXYY= -2646.6232 | XXZZ= -1569.2244 | YYZZ= -1569.2098 |
| XXYZ= 0.0016                                   | YYXZ= 0.0034     | ZZXY= -0.0000    |                  |

## 2. MeCXP-Ti<sub>4</sub>

Dipole moment (Debye):

X= 0.0000      Y= 0.0000      Z= 0.8719      Total= 0.8719

Quadrupole moment (Debye-Ang):

XX= -297.6349      YY= -297.6349      ZZ= -261.5842  
XY= -0.0000      XZ= 0.0000      YZ= 0.0000

Traceless Quadrupole moment (Debye-Ang):

XX= -12.0169      YY= -12.0169      ZZ= 24.0339  
XY= -0.0000      XZ= 0.0000      YZ= 0.0000

Octapole moment (Debye-Ang<sup>2</sup>):

XXX= 0.0000      YYY= -0.0000      ZZZ= -36.4561      XYY= -  
0.0000  
XXY= -0.0000      XXZ= -8.0049      XZZ= 0.0000      YZZ= -  
0.0000  
YYZ= -8.0049      XYZ= 0.0000

Hexadecapole moment (Debye-Ang<sup>3</sup>):

XXXX= -14549.6130      YYYY= -14549.6130      ZZZZ= -1978.8157      XXXY= -133.1421  
XXXZ= -0.0000      YYYYX= 133.1421      YYYZ= 0.0000      ZZZX= 0.0000  
ZZZY= -0.0000      XXYY= -5093.2676      XXZZ= -2678.3119      YYZZ= -2678.3119  
XXYZ= -0.0000      YYXZ= -0.0000      ZZXY= 0.0000

## 3. MeCXP-Ti<sub>4</sub>-4H<sub>2</sub>

Dipole moment (Debye):

X= 0.2247      Y= -1.6814      Z= -1.3261      Total= 2.1531

Quadrupole moment (Debye-Ang):

XX= -306.8157      YY= -315.1425      ZZ= -281.7151  
XY= -10.5856      XZ= -0.4741      YZ= -1.1095

Traceless Quadrupole moment (Debye-Ang):

XX= -5.5913      YY= -13.9181      ZZ= 19.5093  
XY= -10.5856      XZ= -0.4741      YZ= -1.1095

Octapole moment (Debye-Ang<sup>2</sup>):

XXX= 30.1673      YYY= -4.6966      ZZZ= -30.5148      XYY= -20.9295  
XXY= -70.7483      XXZ= -108.8778      XZZ= 0.4297      YZZ= -1.6637  
YYZ= 64.9225      XYZ= 7.4933

Hexadecapole moment (Debye-Ang<sup>3</sup>):

XXXX= -16553.8321      YYYY= -14404.0742      ZZZZ= -2589.8508      XXXY= -435.7983  
XXXZ= -11.6418      YYYYX= 37.9646      YYYZ= -3.2678      ZZZX= -0.2189  
ZZZY= -8.4571      XXYY= -4257.9903      XXZZ= -2918.1760      YYZZ= -2725.0872  
XXYZ= -29.0822      YYXZ= -8.8633      ZZXY= -48.2502

#### 4. MeCXP-Ti<sub>4</sub>-8H<sub>2</sub>

Dipole moment (Debye):

X= -0.0002      Y= 0.0007      Z= -1.7054      Total= 1.7054

Quadrupole moment (Debye-Ang):

XX= -320.4694      YY= -314.8280      ZZ= -292.2902  
XY= 17.5417      XZ= -0.0004      YZ= -0.0019

Traceless Quadrupole moment (Debye-Ang):

XX= -11.2736      YY= -5.6321      ZZ= 16.9057  
XY= 17.5417      XZ= -0.0004      YZ= -0.0019

Octapole moment (Debye-Ang<sup>2</sup>):

XXX= 0.0352      YYY= -0.0520      ZZZ= -64.4105      XYY= -0.0251  
XXY= 0.0157      XXZ= -149.2398      XZZ= -0.0035      YZZ= 0.0571  
YYZ= 153.5288      XYZ= 37.1706

Hexadecapole moment (Debye-Ang<sup>3</sup>):

XXXX= -16196.6213      YYYY= -15016.6060      ZZZZ= -2774.6516      XXXY= 674.3334  
XXXZ= -0.1377      YYYYX= 167.6453      YYYZ= -0.8696      ZZZX= -0.2048  
ZZZY= -0.8413      XXYY= -4579.3503      XXZZ= -3086.2002      YYZZ= -2873.3535  
XXYZ= -0.1765      YYXZ= -0.0115      ZZXY= -61.4306

#### 5. MeCXP-Ti<sub>4</sub>-12H<sub>2</sub>

Dipole moment (Debye):

|                                                |                   |                  |                  |
|------------------------------------------------|-------------------|------------------|------------------|
| X= -0.0008                                     | Y= -0.0003        | Z= 0.2629        | Total= 0.2629    |
| Quadrupole moment (Debye-Ang):                 |                   |                  |                  |
| XX=-344.6023                                   | YY= -343.9927     | ZZ= -270.2626    |                  |
| XY= 0.4999                                     | XZ= -0.0021       | YZ= -0.0053      |                  |
| Traceless Quadrupole moment (Debye-Ang):       |                   |                  |                  |
| XX= -24.9831                                   | YY= -24.3735      | ZZ= 49.3566      |                  |
| XY= 0.4999                                     | XZ= -0.0021       | YZ= -0.0053      |                  |
| Octapole moment (Debye-Ang <sup>2</sup> ):     |                   |                  |                  |
| XXX= -0.0128                                   | YYY= -0.0018      | ZZZ= -22.0333    | XYY= -0.0009     |
| XXY= -0.0151                                   | XXZ= -38.7216     | XZZ= -0.0136     | YZZ= 0.0032      |
| YYZ= 4.7249                                    | XYZ= -9.4738      |                  |                  |
| Hexadecapole moment (Debye-Ang <sup>3</sup> ): |                   |                  |                  |
| XXXX= -18282.3734                              | YYYY= -17634.7578 | ZZZZ= -2095.1723 | XXXY= -311.8937  |
| XXXZ= -0.4300                                  | YYYYX= 387.2895   | YYYZ= -0.5812    | ZZZX= -0.3297    |
| ZZZY= -0.4401                                  | XXYY= -5375.2532  | XXZZ= -2954.2058 | YYZZ= -2936.7565 |
| XXYZ= -0.1848                                  | YYXZ= -0.0786     | ZZXY= -40.6368   |                  |

## 6. MeCXP-Ti<sub>4</sub>-16H<sub>2</sub>

|                                                |                   |                  |                  |
|------------------------------------------------|-------------------|------------------|------------------|
| Dipole moment (Debye):                         |                   |                  |                  |
| X= 0.0001                                      | Y= -0.0012        | Z= 0.9985        | Total= 0.9985    |
| Quadrupole moment (Debye-Ang):                 |                   |                  |                  |
| XX= -331.7086                                  | YY= -331.5747     | ZZ= -280.0331    |                  |
| XY= 0.7431                                     | XZ= -0.0031       | YZ= 0.0010       |                  |
| Traceless Quadrupole moment (Debye-Ang):       |                   |                  |                  |
| XX= -17.2698                                   | YY= -17.1359      | ZZ= 34.4057      |                  |
| XY= 0.7431                                     | XZ= -0.0031       | YZ= 0.0010       |                  |
| Octapole moment (Debye-Ang <sup>2</sup> ):     |                   |                  |                  |
| XXX= -0.0032                                   | YYY= -0.0244      | ZZZ= -15.9962    | XYY= 0.0180      |
| XXY= -0.0073                                   | XXZ= -3.7748      | XZZ= -0.0114     | YZZ= -0.0091     |
| YYZ= 10.0210                                   | XYZ= -0.4685      |                  |                  |
| Hexadecapole moment (Debye-Ang <sup>3</sup> ): |                   |                  |                  |
| XXXX= -17758.1527                              | YYYY= -17390.6180 | ZZZZ= -2149.5902 | XXXY= 121.9744   |
| XXXZ= -0.0364                                  | YYYYX= -47.1500   | YYYZ= -0.0057    | ZZZX= -0.0415    |
| ZZZY= 0.0253                                   | XXYY= -5610.9206  | XXZZ= -3140.0770 | YYZZ= -3117.8279 |
| XXYZ= 0.0008                                   | YYXZ= 0.0060      | ZZXY= -25.3649   |                  |

## Vibrational frequency analysis Calix[4]pyrrole

**Table S6: Vibrational frequencies (cm<sup>-1</sup>) of optimized CXP**

|           |           |           |
|-----------|-----------|-----------|
| 60.1702   | 61.8778   | 70.1631   |
| 76.0532   | 90.1524   | 94.7451   |
| 132.7054  | 162.1021  | 190.8379  |
| 204.3564  | 229.2333  | 231.8142  |
| 247.9959  | 266.0129  | 304.1151  |
| 340.4090  | 342.9810  | 363.3509  |
| 382.1197  | 383.0799  | 392.5316  |
| 411.2103  | 579.8779  | 595.1156  |
| 610.0505  | 631.6164  | 632.7529  |
| 636.6041  | 637.8744  | 640.3148  |
| 662.9521  | 704.2910  | 707.5425  |
| 718.7235  | 732.1247  | 745.7985  |
| 758.2148  | 761.3710  | 775.3559  |
| 775.7596  | 802.5227  | 805.1677  |
| 811.7902  | 820.6002  | 845.8335  |
| 845.8466  | 855.9748  | 867.4907  |
| 876.8547  | 878.7777  | 889.4562  |
| 895.6970  | 896.7704  | 911.3098  |
| 985.4865  | 988.5857  | 991.8250  |
| 996.8188  | 1004.8645 | 1008.4810 |
| 1012.5523 | 1014.3151 | 1043.2447 |
| 1043.6698 | 1049.9898 | 1051.0172 |
| 1141.2025 | 1146.9372 | 1148.8883 |
| 1152.1120 | 1200.3759 | 1203.8672 |
| 1207.8438 | 1208.3294 | 1272.4969 |
| 1279.4394 | 1280.4938 | 1288.9620 |
| 1290.9624 | 1293.4724 | 1298.7798 |
| 1306.4175 | 1330.4175 | 1336.2286 |
| 1341.3510 | 1341.6207 | 1426.5047 |
| 1426.6978 | 1428.1518 | 1429.3393 |
| 1434.4099 | 1437.1416 | 1444.2531 |
| 1449.3376 | 1489.5674 | 1494.3620 |
| 1496.8530 | 1498.2486 | 1530.7282 |
| 1530.8239 | 1549.3093 | 1549.4977 |
| 1636.2967 | 1638.6968 | 1645.6797 |
| 1647.0777 | 2977.8064 | 2978.4022 |
| 2978.5622 | 2979.7326 | 3049.9394 |
| 3050.2432 | 3077.2543 | 3077.2697 |
| 3077.2704 | 3077.3190 | 3118.4429 |
| 3127.5238 | 3145.5311 | 3145.5903 |
| 3161.0945 | 3161.1313 | 3197.2376 |
| 3197.2805 | 3212.6049 | 3212.6418 |

**Table S7: Vibrational frequencies (cm<sup>-1</sup>) of optimized CXP-Ti<sub>4</sub>**

|         |         |         |
|---------|---------|---------|
| 44.4292 | 48.5781 | 54.8432 |
|---------|---------|---------|

|           |           |           |
|-----------|-----------|-----------|
| 57.4095   | 65.9715   | 78.7799   |
| 91.8575   | 142.9723  | 149.9269  |
| 151.5535  | 155.6202  | 159.3005  |
| 160.5606  | 165.4867  | 188.3176  |
| 199.9924  | 203.9502  | 252.7538  |
| 272.0427  | 278.9774  | 285.8624  |
| 302.6814  | 312.6110  | 318.0247  |
| 318.7349  | 336.0928  | 344.6901  |
| 352.2434  | 362.3225  | 368.1769  |
| 380.2108  | 397.2609  | 454.2938  |
| 461.6346  | 467.8945  | 474.1622  |
| 518.1895  | 520.2033  | 523.5774  |
| 545.3778  | 548.1100  | 567.2160  |
| 568.3586  | 574.8689  | 590.2259  |
| 612.6900  | 631.6325  | 661.9667  |
| 666.7383  | 700.2352  | 720.2301  |
| 736.9498  | 739.9211  | 754.0385  |
| 787.0150  | 788.1594  | 802.1144  |
| 813.7732  | 839.4145  | 852.0507  |
| 852.9381  | 860.5688  | 864.4291  |
| 865.4469  | 870.5003  | 881.9999  |
| 887.5439  | 888.6235  | 896.9257  |
| 899.3852  | 899.8335  | 903.0979  |
| 905.3377  | 906.7722  | 1039.0401 |
| 1043.2246 | 1049.7755 | 1053.3969 |
| 1073.2986 | 1085.8788 | 1086.8054 |
| 1097.9160 | 1136.4399 | 1146.1924 |
| 1153.9926 | 1177.2476 | 1183.3470 |
| 1192.4865 | 1199.6876 | 1211.8219 |
| 1262.6134 | 1263.8062 | 1264.4041 |
| 1266.2268 | 1267.9993 | 1274.5308 |
| 1288.3504 | 1313.0475 | 1325.5270 |
| 1330.7485 | 1332.0314 | 1335.7452 |
| 1372.9748 | 1378.5037 | 1397.4414 |
| 1398.8719 | 1405.8447 | 1409.5742 |
| 1411.3288 | 1418.0577 | 1475.5743 |
| 1478.1257 | 1484.7933 | 1485.3179 |
| 1534.9285 | 1536.9999 | 1537.0697 |
| 1537.7788 | 2999.1322 | 2999.1581 |
| 3002.0095 | 3002.0352 | 3050.0747 |
| 3050.2713 | 3056.2233 | 3056.4702 |
| 3189.9860 | 3192.5096 | 3201.7704 |
| 3201.7729 | 3207.4282 | 3209.7797 |
| 3219.4634 | 3219.4869 | 3444.9777 |
| 3496.4218 | 3507.0158 | 3562.5023 |

**Table S8: Vibrational frequencies (cm<sup>-1</sup>) of optimized CXP-Ti<sub>4</sub>-4H<sub>2</sub>**

|          |          |          |
|----------|----------|----------|
| 36.4343  | 40.3888  | 53.6009  |
| 59.4972  | 67.3847  | 68.3751  |
| 102.2262 | 106.3425 | 123.0790 |

|           |           |           |
|-----------|-----------|-----------|
| 133.0243  | 140.9230  | 144.9274  |
| 148.1983  | 162.5310  | 172.9916  |
| 183.4461  | 192.3760  | 198.6196  |
| 203.5866  | 219.2136  | 227.9244  |
| 234.8773  | 262.8246  | 276.4664  |
| 281.9224  | 302.4235  | 314.2169  |
| 316.0276  | 326.1484  | 333.5641  |
| 335.6590  | 345.2375  | 347.3546  |
| 350.4417  | 363.1485  | 366.9896  |
| 374.1551  | 386.6037  | 401.6674  |
| 417.8577  | 442.7663  | 446.8825  |
| 448.7683  | 454.5719  | 470.2584  |
| 490.8068  | 496.8553  | 514.4503  |
| 517.2532  | 529.9102  | 573.2139  |
| 580.1240  | 587.7110  | 592.3952  |
| 598.1505  | 600.6774  | 613.8789  |
| 618.4087  | 649.6509  | 668.4268  |
| 671.6456  | 674.5810  | 676.1199  |
| 677.5567  | 692.1326  | 697.5423  |
| 731.2562  | 733.6043  | 753.2424  |
| 758.8019  | 775.9976  | 810.9766  |
| 819.4848  | 821.0984  | 823.2265  |
| 857.8038  | 864.9246  | 877.8496  |
| 880.1470  | 886.7999  | 892.3226  |
| 904.9575  | 906.5778  | 917.3423  |
| 918.7071  | 922.2636  | 926.4249  |
| 928.4723  | 956.3264  | 959.2230  |
| 1023.7346 | 1047.0907 | 1050.3926 |
| 1064.3748 | 1066.3732 | 1087.7426 |
| 1116.8419 | 1123.7254 | 1151.7311 |
| 1155.0539 | 1168.3822 | 1169.9853 |
| 1178.0626 | 1180.0396 | 1199.3852 |
| 1205.1483 | 1247.2951 | 1248.9180 |
| 1253.3623 | 1260.1641 | 1290.8029 |
| 1297.8731 | 1303.5761 | 1308.0661 |
| 1314.6151 | 1323.0983 | 1324.7276 |
| 1332.7030 | 1353.6415 | 1367.8451 |
| 1379.7933 | 1388.9927 | 1403.3832 |
| 1428.2646 | 1429.6394 | 1433.5141 |
| 1441.9071 | 1481.6347 | 1483.7795 |
| 1487.4211 | 1522.2231 | 1525.7477 |
| 1530.0497 | 1592.9434 | 1601.7114 |
| 1620.5300 | 1625.9307 | 1632.2231 |
| 1648.2484 | 1664.4582 | 1665.2189 |
| 1672.6883 | 2991.2290 | 3003.1171 |
| 3025.1169 | 3035.9391 | 3065.3178 |
| 3076.6423 | 3084.9122 | 3086.6212 |
| 3195.4953 | 3199.9121 | 3200.6043 |
| 3208.0407 | 3215.2344 | 3216.6089 |
| 3232.0628 | 3232.8520 | 3532.2727 |
| 3584.5487 | 3591.9155 | 3597.2199 |

**Table S9: Vibrational frequencies (cm<sup>-1</sup>) of optimized CXP-Ti<sub>4</sub>-8H<sub>2</sub>**

|           |           |           |
|-----------|-----------|-----------|
| 23.1531   | 37.1027   | 44.0113   |
| 47.6217   | 53.8603   | 57.5993   |
| 74.1136   | 106.4332  | 122.0382  |
| 136.9161  | 140.6957  | 142.9829  |
| 151.2917  | 157.2594  | 161.0895  |
| 185.4507  | 204.1529  | 208.8196  |
| 237.2591  | 243.1580  | 244.0003  |
| 246.6647  | 261.5057  | 267.8782  |
| 271.9970  | 277.1842  | 292.3102  |
| 297.8517  | 303.4462  | 318.8950  |
| 327.1159  | 331.2820  | 336.7114  |
| 343.0006  | 356.5810  | 364.9778  |
| 371.4083  | 378.7907  | 390.5279  |
| 396.0899  | 399.9087  | 405.5766  |
| 415.7327  | 428.5827  | 433.5997  |
| 437.7070  | 442.9051  | 445.6458  |
| 446.8127  | 453.7435  | 469.0949  |
| 482.9850  | 496.9627  | 503.2698  |
| 536.2246  | 542.8591  | 543.8102  |
| 570.0073  | 590.0573  | 595.2381  |
| 598.6419  | 604.6087  | 616.9662  |
| 623.4258  | 631.6098  | 642.2836  |
| 644.5485  | 662.6115  | 668.0485  |
| 681.4356  | 690.8658  | 696.6578  |
| 707.8754  | 719.0986  | 735.6238  |
| 745.1548  | 751.3619  | 762.6032  |
| 766.7468  | 800.2358  | 808.3364  |
| 815.4629  | 836.5206  | 848.5646  |
| 859.4580  | 874.5310  | 886.5067  |
| 890.9693  | 894.6761  | 896.9716  |
| 898.8019  | 902.0808  | 904.9062  |
| 907.0781  | 911.6993  | 913.3896  |
| 915.0619  | 916.2087  | 931.9892  |
| 940.8079  | 947.0392  | 948.5049  |
| 951.9826  | 954.7601  | 962.8847  |
| 976.6728  | 1028.0698 | 1042.4830 |
| 1050.2506 | 1057.1243 | 1090.5340 |
| 1098.6919 | 1104.3450 | 1121.6643 |
| 1165.8316 | 1172.1662 | 1177.5198 |
| 1180.7114 | 1195.2637 | 1204.6317 |
| 1216.5122 | 1232.9408 | 1262.6350 |
| 1267.3485 | 1268.5264 | 1270.9034 |
| 1305.7461 | 1313.4604 | 1316.7547 |
| 1330.2389 | 1333.9273 | 1346.5390 |
| 1348.3145 | 1353.8036 | 1372.3335 |
| 1378.9481 | 1386.3454 | 1395.7548 |
| 1409.9655 | 1410.9600 | 1415.9074 |
| 1417.4753 | 1479.9060 | 1495.7902 |

|           |           |           |
|-----------|-----------|-----------|
| 1498.2970 | 1503.7849 | 1515.9239 |
| 1520.7345 | 1524.7079 | 1524.9409 |
| 1525.4261 | 1533.8696 | 1540.9892 |
| 1586.6524 | 1587.2414 | 1589.6763 |
| 1596.8830 | 1600.2364 | 1621.6935 |
| 1625.1132 | 1630.4936 | 1641.1938 |
| 3019.8547 | 3023.1772 | 3026.4468 |
| 3029.9621 | 3071.7102 | 3079.7772 |
| 3079.8454 | 3083.7821 | 3203.2060 |
| 3206.6379 | 3206.6521 | 3208.8849 |
| 3224.3610 | 3230.2987 | 3230.5704 |
| 3235.6526 | 3239.3601 | 3263.8799 |
| 3265.8973 | 3271.4104 | 3531.2857 |
| 3537.6362 | 3592.1336 | 3595.2773 |

**Table S10: Vibrational frequencies (cm<sup>-1</sup>) of optimized CXP-Ti<sub>4</sub>-12H<sub>2</sub>**

|          |          |          |
|----------|----------|----------|
| 14.7545  | 48.8475  | 51.8979  |
| 58.5871  | 58.8914  | 59.5955  |
| 74.2062  | 133.1927 | 134.6786 |
| 136.3337 | 149.4329 | 150.7213 |
| 159.1919 | 162.9394 | 167.6307 |
| 179.7797 | 188.2873 | 196.2777 |
| 229.9473 | 234.5714 | 238.4237 |
| 275.0001 | 279.1564 | 296.0263 |
| 298.1560 | 304.9404 | 328.3323 |
| 328.6562 | 332.1161 | 336.0925 |
| 341.4391 | 343.9214 | 354.9683 |
| 355.2844 | 370.1971 | 372.8749 |
| 377.9924 | 381.6037 | 382.9510 |
| 384.5171 | 389.0612 | 392.9652 |
| 397.0228 | 400.5551 | 401.4907 |
| 404.9864 | 408.9945 | 416.3033 |
| 426.0521 | 433.6222 | 436.4727 |
| 440.9039 | 440.9249 | 444.6670 |
| 455.0270 | 455.1317 | 455.4290 |
| 456.8306 | 518.2946 | 520.8711 |
| 535.1508 | 535.8679 | 581.5999 |
| 586.6465 | 586.7721 | 595.3754 |
| 601.1882 | 602.9624 | 603.4113 |
| 606.6704 | 615.6101 | 619.6653 |
| 622.4345 | 631.7181 | 637.3734 |
| 642.1485 | 647.1009 | 661.0162 |
| 668.1497 | 696.8428 | 698.6483 |
| 730.7806 | 733.7544 | 748.1725 |
| 753.2115 | 762.3518 | 798.0457 |
| 799.8863 | 803.3721 | 805.8211 |
| 845.8092 | 857.1178 | 862.9282 |
| 871.2646 | 875.6384 | 878.5510 |
| 879.8306 | 883.8913 | 895.4872 |
| 896.0987 | 899.0991 | 899.4061 |



|           |           |           |
|-----------|-----------|-----------|
| 913.6396  | 916.0699  | 918.2773  |
| 918.7599  | 923.0181  | 923.8100  |
| 926.9768  | 928.9768  | 932.8919  |
| 935.8666  | 942.4118  | 944.1680  |
| 953.8251  | 954.6812  | 973.3286  |
| 973.6438  | 984.0138  | 984.1720  |
| 985.8240  | 986.2813  | 1041.9087 |
| 1045.7955 | 1046.9663 | 1051.6437 |
| 1106.5930 | 1109.3613 | 1114.5802 |
| 1118.0294 | 1163.0478 | 1166.8632 |
| 1183.4013 | 1185.8483 | 1207.3998 |
| 1223.1940 | 1230.1332 | 1246.6987 |
| 1271.9481 | 1272.7756 | 1276.4833 |
| 1277.1119 | 1306.8319 | 1314.9323 |
| 1321.3227 | 1337.8221 | 1340.0584 |
| 1355.1284 | 1358.4723 | 1364.4639 |
| 1387.3916 | 1396.8636 | 1402.1933 |
| 1404.0180 | 1409.8705 | 1410.4287 |
| 1412.6759 | 1417.4324 | 1515.1394 |
| 1515.5977 | 1516.2741 | 1516.9477 |
| 1520.8026 | 1520.9275 | 1525.0997 |
| 1525.1110 | 1529.5387 | 1529.6960 |
| 1546.5274 | 1546.5409 | 1564.4214 |
| 1564.4384 | 1564.8964 | 1565.1109 |
| 1579.3666 | 1579.5704 | 1591.3574 |
| 1591.7638 | 1594.3261 | 1595.3846 |
| 1596.1831 | 1600.5170 | 3024.1259 |
| 3024.1391 | 3026.2852 | 3026.3071 |
| 3076.3006 | 3076.3129 | 3079.5978 |
| 3079.6133 | 3210.0854 | 3210.0912 |
| 3217.4816 | 3217.4846 | 3231.6322 |
| 3231.6492 | 3233.3274 | 3233.3456 |
| 3236.4421 | 3236.5268 | 3256.6278 |
| 3256.7777 | 3307.4875 | 3307.7716 |
| 3318.6076 | 3319.1007 | 3527.3628 |
| 3527.5289 | 3631.8925 | 3634.4590 |

**Table S11: Vibrational frequencies (cm<sup>-1</sup>) of optimized CXP-Ti<sub>4</sub>-16H<sub>2</sub>**

|          |          |          |
|----------|----------|----------|
| 9.3592   | 51.8697  | 52.0917  |
| 53.2923  | 54.4163  | 61.0874  |
| 72.3343  | 129.9170 | 131.4494 |
| 135.0777 | 151.0901 | 153.5469 |
| 155.9239 | 163.3043 | 165.7141 |
| 177.7124 | 189.9435 | 195.4325 |
| 216.7813 | 220.6849 | 228.0504 |
| 249.6896 | 252.7442 | 252.8429 |
| 256.0030 | 271.8726 | 283.5240 |
| 290.1026 | 290.6321 | 308.0240 |
| 319.5428 | 321.5902 | 328.9946 |
| 334.1102 | 336.5687 | 338.1515 |

|           |           |           |
|-----------|-----------|-----------|
| 340.4824  | 351.0743  | 365.5425  |
| 372.5779  | 375.2939  | 380.7052  |
| 383.8320  | 388.4687  | 392.4090  |
| 397.6087  | 403.2538  | 403.9157  |
| 407.4718  | 413.0740  | 426.2773  |
| 426.5305  | 433.8359  | 450.9633  |
| 506.2461  | 507.9620  | 526.7624  |
| 531.5701  | 532.8639  | 534.5953  |
| 551.5666  | 552.1096  | 557.7682  |
| 558.9855  | 566.3269  | 568.9441  |
| 572.7902  | 577.1068  | 581.6794  |
| 583.6125  | 584.8066  | 585.2857  |
| 593.6579  | 596.0634  | 597.2387  |
| 599.3320  | 614.8582  | 617.9129  |
| 619.3533  | 622.8373  | 630.0623  |
| 637.5368  | 642.4588  | 645.3973  |
| 662.6143  | 696.2723  | 699.2179  |
| 725.9994  | 730.2199  | 735.8789  |
| 743.8218  | 748.8993  | 756.2727  |
| 762.6968  | 799.1912  | 800.3902  |
| 809.0035  | 811.1889  | 843.0752  |
| 844.3640  | 849.2020  | 863.1447  |
| 865.0411  | 881.0137  | 882.9116  |
| 884.3460  | 893.3464  | 893.8412  |
| 905.4608  | 906.8105  | 913.9702  |
| 917.7702  | 918.1805  | 918.6124  |
| 921.2599  | 922.0702  | 922.5067  |
| 924.5871  | 928.0915  | 928.6384  |
| 932.5760  | 933.4778  | 941.1993  |
| 941.4505  | 955.1354  | 956.4825  |
| 957.8044  | 958.9594  | 968.9971  |
| 969.7454  | 977.6862  | 978.5584  |
| 981.8403  | 982.3355  | 995.4428  |
| 995.5218  | 1043.6732 | 1045.8118 |
| 1047.4371 | 1050.2670 | 1051.5125 |
| 1051.7759 | 1107.0930 | 1108.2865 |
| 1116.3879 | 1117.6464 | 1163.3904 |
| 1165.9355 | 1188.1964 | 1189.7611 |
| 1210.4598 | 1226.7135 | 1232.4956 |
| 1252.3695 | 1270.2991 | 1271.3632 |
| 1276.9141 | 1277.7110 | 1305.2957 |
| 1313.1484 | 1323.8413 | 1337.3548 |
| 1345.5279 | 1358.1729 | 1361.2432 |
| 1367.3886 | 1389.4689 | 1398.1738 |
| 1402.3972 | 1404.6219 | 1408.3402 |
| 1408.4021 | 1409.6633 | 1410.0096 |
| 1413.4795 | 1417.1462 | 1443.4557 |
| 1443.4797 | 1508.8720 | 1508.9445 |
| 1511.6365 | 1511.7491 | 1521.9926 |
| 1522.1942 | 1523.5430 | 1523.8440 |
| 1526.8423 | 1526.8664 | 1531.2700 |

|           |           |           |
|-----------|-----------|-----------|
| 1531.4356 | 1545.4605 | 1545.5163 |
| 1546.4648 | 1546.7482 | 1555.1228 |
| 1555.5792 | 1563.4045 | 1564.5560 |
| 1578.2598 | 1578.4731 | 1586.4522 |
| 1586.6269 | 3022.5655 | 3022.5784 |
| 3028.5793 | 3028.5996 | 3076.5216 |
| 3076.5359 | 3081.6884 | 3081.7080 |
| 3201.0380 | 3201.1247 | 3208.3195 |
| 3208.3315 | 3215.4260 | 3215.4321 |
| 3231.2256 | 3231.3361 | 3233.1668 |
| 3233.1774 | 3236.2050 | 3236.2229 |
| 3322.2337 | 3322.2469 | 3327.3249 |
| 3328.1834 | 3407.3451 | 3407.4471 |
| 3431.5363 | 3431.5867 | 3520.8008 |
| 3521.1115 | 3640.4729 | 3641.5354 |

**Table S12: Vibrational frequencies (cm<sup>-1</sup>) of optimized MeCXP**

|           |           |           |
|-----------|-----------|-----------|
| 46.2889   | 54.3502   | 66.3259   |
| 76.2576   | 82.6564   | 99.0314   |
| 118.0142  | 120.5941  | 124.6645  |
| 130.3128  | 146.8409  | 179.3577  |
| 185.5132  | 220.7616  | 238.1196  |
| 250.3591  | 254.4706  | 258.3266  |
| 271.0066  | 277.0315  | 281.8228  |
| 288.9073  | 296.7388  | 300.1411  |
| 313.1164  | 313.4194  | 329.0315  |
| 330.0185  | 339.2000  | 350.7938  |
| 353.7710  | 367.4166  | 371.0494  |
| 373.6449  | 375.6842  | 380.7577  |
| 391.6007  | 395.3278  | 401.5173  |
| 413.7439  | 424.7568  | 453.1755  |
| 474.2028  | 506.8874  | 512.5532  |
| 513.2338  | 530.1330  | 533.8001  |
| 548.8242  | 554.6311  | 584.9270  |
| 600.0116  | 645.5263  | 648.4419  |
| 653.6279  | 656.3171  | 695.0508  |
| 699.4621  | 711.4128  | 719.1985  |
| 725.1220  | 732.8779  | 736.8045  |
| 746.1861  | 755.2028  | 786.6329  |
| 796.0522  | 818.6895  | 841.6231  |
| 852.4514  | 853.9470  | 867.7605  |
| 892.1859  | 896.4224  | 900.1795  |
| 902.6451  | 906.6972  | 936.3902  |
| 941.5644  | 945.3778  | 946.7809  |
| 950.5328  | 962.6389  | 964.9524  |
| 969.5421  | 973.4211  | 988.7826  |
| 992.2350  | 994.9765  | 1008.9871 |
| 1016.6730 | 1019.4583 | 1021.6735 |

|           |           |           |
|-----------|-----------|-----------|
| 1051.7640 | 1067.4146 | 1068.7851 |
| 1070.9654 | 1080.5500 | 1115.4013 |
| 1129.2039 | 1131.9868 | 1141.3564 |
| 1150.6865 | 1157.4739 | 1160.7376 |
| 1162.7305 | 1166.7443 | 1168.3168 |
| 1172.1249 | 1178.9187 | 1237.6203 |
| 1241.3538 | 1245.7073 | 1246.9161 |
| 1249.2441 | 1265.8565 | 1273.9692 |
| 1283.9750 | 1287.7515 | 1291.1438 |
| 1294.7986 | 1300.1062 | 1363.7537 |
| 1369.5207 | 1371.8054 | 1376.2376 |
| 1385.3070 | 1389.9844 | 1394.0637 |
| 1395.7520 | 1397.6897 | 1402.8800 |
| 1414.7765 | 1427.5377 | 1441.2317 |
| 1448.5836 | 1451.2262 | 1452.2262 |
| 1453.4780 | 1458.1212 | 1461.1663 |
| 1462.0721 | 1464.2821 | 1466.2074 |
| 1468.2852 | 1468.5568 | 1474.0619 |
| 1477.6379 | 1479.5232 | 1480.8838 |
| 1484.0524 | 1492.8007 | 1495.3137 |
| 1502.7657 | 1505.4838 | 1507.4418 |
| 1514.0741 | 1517.8329 | 1604.5873 |
| 1611.4515 | 1614.0386 | 1619.3801 |
| 2193.9282 | 2940.4454 | 2947.1568 |
| 2957.3979 | 2961.2034 | 2974.6595 |
| 3001.7440 | 3006.6285 | 3016.9611 |
| 3025.9166 | 3028.5903 | 3033.7373 |
| 3046.9176 | 3047.3353 | 3064.5577 |
| 3090.9603 | 3093.6188 | 3096.9377 |
| 3103.3671 | 3105.0545 | 3125.3160 |
| 3134.0854 | 3138.1144 | 3140.0545 |
| 3149.9346 | 3155.6737 | 3161.9622 |
| 3166.8344 | 3171.0852 | 3178.4162 |
| 3190.2006 | 3208.7753 | 3239.9598 |
| 3253.4264 | 3346.9113 | 3535.0496 |

**Table S13: Vibrational frequencies (cm<sup>-1</sup>) of optimized MeXP-Ti<sub>4</sub>**

|          |          |          |
|----------|----------|----------|
| 29.7827  | 34.4715  | 56.7384  |
| 59.9088  | 64.9997  | 76.7184  |
| 80.6993  | 106.8979 | 114.5001 |
| 120.6318 | 136.1726 | 140.9703 |
| 141.8233 | 152.6497 | 167.2617 |
| 170.4350 | 173.8382 | 179.6901 |
| 220.8195 | 227.7476 | 232.2893 |
| 233.7818 | 239.7526 | 244.1005 |
| 248.8858 | 252.4368 | 256.0883 |
| 258.7169 | 265.3136 | 267.8400 |
| 269.8893 | 271.7537 | 278.5970 |
| 291.9865 | 295.2054 | 298.8090 |
| 299.6834 | 308.5716 | 309.4371 |

|           |           |           |
|-----------|-----------|-----------|
| 318.1542  | 330.0362  | 351.1903  |
| 359.3973  | 366.4060  | 373.7193  |
| 373.8413  | 385.9069  | 389.7012  |
| 390.5005  | 404.0498  | 404.0891  |
| 430.2447  | 434.1783  | 476.7534  |
| 484.0998  | 488.4793  | 498.3587  |
| 512.0990  | 516.9191  | 518.5672  |
| 518.7607  | 530.7669  | 534.9477  |
| 558.8904  | 559.7077  | 564.6338  |
| 577.3464  | 579.8626  | 613.9057  |
| 626.5204  | 652.6443  | 656.9219  |
| 659.8722  | 663.2941  | 690.8768  |
| 693.1622  | 702.4616  | 706.4559  |
| 790.8906  | 796.5909  | 804.8952  |
| 813.2628  | 854.1666  | 855.7642  |
| 858.7037  | 860.4655  | 862.9453  |
| 868.1927  | 881.9013  | 884.8545  |
| 892.2586  | 898.4589  | 906.4295  |
| 910.8947  | 930.3686  | 931.6932  |
| 939.3852  | 941.1595  | 950.0262  |
| 950.1337  | 954.3095  | 954.3710  |
| 987.4501  | 990.6206  | 991.4407  |
| 994.3776  | 1041.2649 | 1041.6765 |
| 1050.8160 | 1054.1036 | 1060.8555 |
| 1072.1647 | 1079.8618 | 1095.4121 |
| 1113.2608 | 1122.4275 | 1124.6446 |
| 1127.2116 | 1128.9634 | 1131.0643 |
| 1139.7902 | 1152.3359 | 1168.4232 |
| 1187.6617 | 1192.0245 | 1214.0081 |
| 1216.2788 | 1225.9484 | 1226.4828 |
| 1230.3232 | 1235.7538 | 1237.6894 |
| 1242.2207 | 1244.5130 | 1301.8056 |
| 1301.8910 | 1314.6697 | 1315.2528 |
| 1339.9798 | 1340.9193 | 1358.2415 |
| 1358.5328 | 1363.6113 | 1367.3350 |
| 1374.9746 | 1376.7875 | 1380.3375 |
| 1381.9927 | 1386.0614 | 1387.3191 |
| 1441.8665 | 1442.0186 | 1442.5346 |
| 1442.6515 | 1448.2140 | 1448.9618 |
| 1458.6151 | 1458.7507 | 1459.0587 |
| 1459.3211 | 1462.5209 | 1465.3116 |
| 1467.4168 | 1473.3377 | 1481.3663 |
| 1484.3061 | 1485.0733 | 1485.4956 |
| 1488.4744 | 1488.5627 | 1522.3972 |
| 1522.5650 | 1536.1214 | 1536.1293 |
| 2951.6066 | 2951.7438 | 2960.7522 |
| 2960.7888 | 3014.3523 | 3014.3737 |
| 3014.8875 | 3014.8994 | 3016.8691 |
| 3016.9195 | 3074.2080 | 3074.2627 |
| 3096.3535 | 3096.3620 | 3100.6405 |
| 3100.6807 | 3105.2690 | 3105.2922 |

|           |           |           |
|-----------|-----------|-----------|
| 3107.4940 | 3107.5518 | 3116.2211 |
| 3116.2437 | 3129.8505 | 3129.8937 |
| 3141.7864 | 3141.7950 | 3185.8928 |
| 3185.9264 | 3203.0590 | 3203.0803 |
| 3243.4379 | 3243.4608 | 3335.3608 |
| 3342.1149 | 3429.5395 | 3429.8012 |

**Table S14: Vibrational frequencies (cm<sup>-1</sup>) of optimized MeCXP-Ti<sub>4</sub>-4H<sub>2</sub>**

|           |           |           |
|-----------|-----------|-----------|
| 12.0883   | 41.1070   | 51.8147   |
| 59.5465   | 59.9255   | 68.4283   |
| 82.1714   | 99.5172   | 112.0707  |
| 120.2353  | 137.3355  | 142.3929  |
| 142.5150  | 146.4892  | 147.7543  |
| 153.4394  | 159.1439  | 161.5711  |
| 194.6079  | 201.0085  | 219.8574  |
| 221.2088  | 226.2314  | 229.4215  |
| 236.8609  | 240.2161  | 251.2717  |
| 263.9238  | 270.3271  | 271.4279  |
| 272.2465  | 276.3060  | 283.5853  |
| 287.4541  | 291.3090  | 294.1987  |
| 298.5342  | 301.8489  | 306.3407  |
| 310.6020  | 314.7862  | 317.8824  |
| 327.1605  | 330.1482  | 331.4997  |
| 336.7086  | 348.4481  | 355.3931  |
| 356.6808  | 358.3598  | 360.2991  |
| 366.6588  | 368.5563  | 370.0284  |
| 382.3096  | 386.0568  | 392.8191  |
| 401.7342  | 413.8538  | 417.6806  |
| 421.8728  | 426.3087  | 439.3756  |
| 443.9870  | 459.3692  | 468.6473  |
| 475.6444  | 475.9131  | 484.4212  |
| 493.3649  | 502.2348  | 515.0265  |
| 524.6621  | 533.7965  | 537.8555  |
| 551.5610  | 555.4374  | 574.6300  |
| 603.8329  | 610.1686  | 617.6818  |
| 625.1060  | 632.8783  | 647.9934  |
| 653.1396  | 656.2606  | 657.5516  |
| 669.7977  | 677.2591  | 679.7353  |
| 686.3308  | 693.3939  | 696.8800  |
| 710.3883  | 817.6876  | 821.0181  |
| 821.6579  | 825.6387  | 869.1668  |
| 870.7665  | 872.2356  | 879.9134  |
| 881.0694  | 893.8924  | 898.4747  |
| 905.3026  | 921.3862  | 924.7448  |
| 929.3302  | 930.2896  | 936.6966  |
| 939.0419  | 940.2514  | 941.6599  |
| 947.5715  | 950.7651  | 952.1915  |
| 954.1680  | 1003.5768 | 1006.6541 |
| 1008.6882 | 1012.3772 | 1045.6877 |
| 1050.5017 | 1064.3490 | 1067.4414 |

|           |           |           |
|-----------|-----------|-----------|
| 1069.1907 | 1083.9638 | 1087.0575 |
| 1106.9940 | 1114.9189 | 1122.3888 |
| 1131.9655 | 1136.4871 | 1137.6958 |
| 1140.9964 | 1148.1781 | 1162.3789 |
| 1171.3421 | 1189.5991 | 1195.1808 |
| 1212.4512 | 1218.8806 | 1223.9350 |
| 1224.5492 | 1229.2752 | 1237.4170 |
| 1239.4494 | 1248.1512 | 1250.9820 |
| 1306.3401 | 1307.8608 | 1321.3781 |
| 1323.4762 | 1343.7020 | 1345.2632 |
| 1360.9595 | 1361.4551 | 1374.4545 |
| 1376.0243 | 1377.1185 | 1379.1226 |
| 1395.0694 | 1396.4059 | 1397.7773 |
| 1398.7483 | 1445.1786 | 1446.2439 |
| 1449.2393 | 1450.4895 | 1451.5823 |
| 1452.8281 | 1456.0553 | 1457.3281 |
| 1465.2950 | 1465.7034 | 1466.7282 |
| 1467.8915 | 1475.3525 | 1475.6952 |
| 1477.7133 | 1478.7295 | 1482.5832 |
| 1484.0283 | 1487.9503 | 1488.4099 |
| 1520.2022 | 1521.4085 | 1529.7439 |
| 1530.3074 | 1604.5529 | 1613.0343 |
| 1617.0393 | 1622.7973 | 1628.9887 |
| 1643.0881 | 1644.8056 | 1653.0482 |
| 3010.6937 | 3011.6819 | 3012.4899 |
| 3013.0717 | 3016.5113 | 3017.3175 |
| 3017.8867 | 3018.5129 | 3087.6994 |
| 3088.7139 | 3090.0469 | 3090.9583 |
| 3098.0694 | 3099.9541 | 3100.7184 |
| 3102.9640 | 3107.2999 | 3108.0510 |
| 3110.2973 | 3110.6392 | 3111.7723 |
| 3111.9131 | 3113.6849 | 3114.2891 |
| 3197.0740 | 3197.6100 | 3204.0058 |
| 3209.1965 | 3220.0309 | 3220.8595 |
| 3225.5613 | 3232.9272 | 3557.9232 |
| 3559.2200 | 3583.7519 | 3585.9322 |

**Table S15: Vibrational frequencies (cm<sup>-1</sup>) of optimized MeCXP-Ti<sub>4</sub>-8H<sub>2</sub>**

|          |          |          |
|----------|----------|----------|
| 14.4616  | 45.8849  | 53.7138  |
| 59.9259  | 63.7836  | 83.1699  |
| 93.8454  | 96.6833  | 111.2685 |
| 116.5738 | 122.0943 | 133.2932 |
| 144.3448 | 149.1401 | 162.6343 |
| 165.1600 | 167.2950 | 171.2875 |
| 171.7830 | 181.5485 | 193.4038 |
| 210.2387 | 223.8468 | 225.1562 |
| 233.8665 | 242.8118 | 254.3136 |
| 254.9341 | 257.3931 | 262.5601 |
| 266.0552 | 268.1615 | 284.3024 |
| 286.9720 | 289.2905 | 291.5075 |

|           |           |           |
|-----------|-----------|-----------|
| 296.7308  | 297.8390  | 307.0454  |
| 313.3062  | 315.7298  | 315.8190  |
| 320.2908  | 322.0777  | 329.9831  |
| 332.2688  | 340.3256  | 346.2014  |
| 352.5852  | 356.1074  | 362.6270  |
| 366.4918  | 372.1826  | 375.2153  |
| 381.7309  | 391.3153  | 393.2630  |
| 398.6596  | 406.2239  | 410.7509  |
| 416.7687  | 417.7169  | 420.3400  |
| 432.8692  | 433.7521  | 442.1506  |
| 448.0865  | 449.1899  | 453.0123  |
| 468.4507  | 469.7979  | 500.7162  |
| 505.9598  | 515.1876  | 520.2180  |
| 528.1915  | 531.5417  | 537.7779  |
| 541.1592  | 555.8431  | 563.4566  |
| 578.2866  | 589.8512  | 597.8213  |
| 606.8838  | 612.2001  | 616.9874  |
| 617.5744  | 624.2691  | 628.6913  |
| 644.7622  | 647.3276  | 656.9322  |
| 657.8712  | 673.4683  | 676.2201  |
| 685.6963  | 691.7488  | 717.4677  |
| 721.1428  | 727.4750  | 731.5208  |
| 764.3363  | 764.3802  | 800.0861  |
| 801.4854  | 837.7841  | 838.7152  |
| 873.4880  | 873.7304  | 876.6397  |
| 881.4406  | 886.1428  | 887.6652  |
| 891.8477  | 898.4736  | 901.5875  |
| 902.7143  | 910.9903  | 913.2259  |
| 931.7220  | 932.0094  | 939.9234  |
| 940.0807  | 947.8033  | 947.9367  |
| 954.3959  | 954.4245  | 959.4093  |
| 959.8080  | 979.2149  | 979.4345  |
| 998.0839  | 998.7985  | 1004.8660 |
| 1005.7003 | 1011.7674 | 1012.3021 |
| 1038.9156 | 1040.6717 | 1062.9005 |
| 1063.0636 | 1069.5095 | 1072.1137 |
| 1097.3514 | 1105.8451 | 1117.6813 |
| 1123.2650 | 1135.1294 | 1142.8824 |
| 1145.2153 | 1148.1717 | 1158.1589 |
| 1168.3635 | 1180.4949 | 1190.9615 |
| 1208.4043 | 1216.7083 | 1226.9631 |
| 1228.5619 | 1231.2336 | 1233.1731 |
| 1246.3113 | 1249.9329 | 1263.6139 |
| 1264.2728 | 1311.3858 | 1311.5014 |
| 1336.8547 | 1337.7741 | 1352.6539 |
| 1353.2254 | 1363.2164 | 1363.8831 |
| 1369.8391 | 1370.5565 | 1380.4626 |
| 1381.8833 | 1383.1526 | 1386.1376 |
| 1396.9539 | 1397.2195 | 1447.5487 |
| 1447.6427 | 1451.3771 | 1451.4828 |
| 1457.2432 | 1457.3348 | 1459.4212 |



|           |           |           |
|-----------|-----------|-----------|
| 1459.5551 | 1467.9472 | 1467.9954 |
| 1474.0008 | 1474.1184 | 1480.7748 |
| 1481.0763 | 1484.0245 | 1485.0357 |
| 1486.9965 | 1487.5590 | 1495.1541 |
| 1495.3931 | 1517.7038 | 1517.9029 |
| 1520.8513 | 1520.9048 | 1538.9114 |
| 1539.0002 | 1586.4372 | 1587.5284 |
| 1596.7164 | 1596.7763 | 1615.2204 |
| 1615.7460 | 1619.0000 | 1619.8939 |
| 1641.9637 | 1644.4124 | 3005.4653 |
| 3005.4807 | 3013.3259 | 3013.5360 |
| 3023.3914 | 3023.4147 | 3029.3683 |
| 3029.3816 | 3077.9392 | 3077.9508 |
| 3088.6311 | 3088.9303 | 3104.4402 |
| 3104.4512 | 3107.0443 | 3107.0649 |
| 3108.0587 | 3108.0979 | 3111.2770 |
| 3111.3184 | 3122.8256 | 3122.9934 |
| 3129.0063 | 3129.0467 | 3135.2829 |
| 3135.6516 | 3199.8893 | 3199.9123 |
| 3224.5603 | 3224.6890 | 3229.7244 |
| 3229.7475 | 3246.8059 | 3246.8232 |
| 3279.8765 | 3280.3835 | 3554.6323 |
| 3554.7208 | 3565.4244 | 3582.5496 |

**Table S16: Vibrational frequencies (cm<sup>-1</sup>) of optimized MeCXP-Ti<sub>4</sub>-12H<sub>2</sub>**

|          |          |          |
|----------|----------|----------|
| 25.5383  | 37.5626  | 59.9660  |
| 69.6371  | 72.5644  | 78.2300  |
| 87.4222  | 119.4367 | 119.6307 |
| 124.1492 | 132.9734 | 142.7010 |
| 144.2131 | 154.0876 | 159.4027 |
| 175.4311 | 178.4250 | 184.4185 |
| 197.2435 | 200.8685 | 202.9237 |
| 216.3440 | 237.1056 | 238.9405 |
| 246.5158 | 254.2072 | 263.0002 |
| 264.2216 | 270.7690 | 276.5756 |
| 283.2084 | 283.9368 | 285.8758 |
| 292.1243 | 293.6365 | 295.1697 |
| 303.9289 | 305.2077 | 312.7323 |
| 312.8715 | 318.9574 | 319.8370 |
| 327.5074 | 337.0623 | 341.3157 |
| 342.0647 | 348.5151 | 348.8388 |
| 350.1619 | 355.1979 | 366.7942 |
| 367.1004 | 368.2758 | 373.3906 |
| 377.9541 | 382.2773 | 383.1278 |
| 386.6922 | 392.6244 | 392.8308 |
| 400.7970 | 401.9851 | 405.5822 |
| 409.1446 | 409.1816 | 416.1218 |
| 424.1335 | 425.5351 | 426.6736 |
| 427.3530 | 434.3990 | 437.1951 |
| 451.8387 | 453.9689 | 460.3770 |

|           |           |           |
|-----------|-----------|-----------|
| 460.9246  | 465.3208  | 468.9981  |
| 488.7172  | 511.9071  | 515.8644  |
| 518.5512  | 531.7681  | 537.8945  |
| 541.9193  | 552.3691  | 569.2320  |
| 575.5369  | 580.8306  | 583.7434  |
| 598.7238  | 600.6611  | 603.6469  |
| 604.0004  | 617.5024  | 620.1568  |
| 620.6600  | 622.6668  | 649.1510  |
| 650.3226  | 653.6788  | 660.6283  |
| 680.4818  | 689.9042  | 689.9267  |
| 697.6337  | 705.5934  | 705.7907  |
| 706.9784  | 723.0276  | 808.5086  |
| 812.5465  | 820.5021  | 826.8824  |
| 859.9650  | 860.0766  | 878.6869  |
| 879.1589  | 885.1021  | 886.9497  |
| 893.3031  | 894.1514  | 904.7269  |
| 907.2331  | 908.2644  | 909.6875  |
| 914.5201  | 915.0333  | 918.3043  |
| 923.9643  | 933.8738  | 934.3250  |
| 936.2956  | 936.4168  | 939.5803  |
| 940.2204  | 944.1008  | 945.0817  |
| 952.7803  | 953.2385  | 957.3393  |
| 957.6582  | 966.3713  | 966.4196  |
| 985.6919  | 985.7254  | 986.6010  |
| 986.6758  | 1002.2642 | 1004.7683 |
| 1009.5114 | 1012.1783 | 1033.2885 |
| 1033.5821 | 1053.6351 | 1053.8921 |
| 1063.8908 | 1067.6756 | 1082.1333 |
| 1094.5705 | 1098.9789 | 1115.5962 |
| 1125.9750 | 1140.1200 | 1144.0789 |
| 1144.5606 | 1155.9627 | 1158.3994 |
| 1161.3588 | 1175.8269 | 1189.9975 |
| 1212.8140 | 1213.0288 | 1222.1804 |
| 1224.5393 | 1234.4672 | 1235.1527 |
| 1248.2829 | 1252.4366 | 1255.0335 |
| 1257.2729 | 1258.6814 | 1343.9026 |
| 1344.4071 | 1346.2291 | 1346.4476 |
| 1354.7381 | 1359.7782 | 1360.5666 |
| 1363.9162 | 1372.8566 | 1376.8419 |
| 1378.7442 | 1384.5600 | 1387.8839 |
| 1389.4210 | 1392.8905 | 1395.9055 |
| 1449.8383 | 1449.9407 | 1450.8431 |
| 1451.2203 | 1458.5758 | 1459.1391 |
| 1464.5297 | 1464.7296 | 1473.9829 |
| 1474.4268 | 1479.5627 | 1480.6563 |
| 1488.2463 | 1489.1620 | 1495.3964 |
| 1498.8485 | 1501.1853 | 1502.4412 |
| 1504.9705 | 1509.3179 | 1514.1676 |
| 1517.9673 | 1519.4413 | 1521.3813 |
| 1527.6651 | 1527.7828 | 1531.6070 |
| 1531.6403 | 1555.3803 | 1555.4626 |

|           |           |           |
|-----------|-----------|-----------|
| 1560.9539 | 1560.9724 | 1588.2658 |
| 1588.6380 | 1590.3909 | 1590.6176 |
| 1600.1031 | 1602.0961 | 1613.2916 |
| 1613.4452 | 3001.8821 | 3002.0218 |
| 3003.8030 | 3004.2628 | 3032.2421 |
| 3032.2572 | 3035.3744 | 3035.3872 |
| 3085.7423 | 3085.7677 | 3089.5277 |
| 3089.6116 | 3112.0932 | 3112.1059 |
| 3113.9857 | 3113.9956 | 3123.4876 |
| 3123.5005 | 3128.7919 | 3128.8199 |
| 3133.2880 | 3133.3523 | 3136.2092 |
| 3136.2630 | 3192.6361 | 3192.7315 |
| 3201.8641 | 3201.9985 | 3214.0301 |
| 3214.1607 | 3219.8343 | 3219.9992 |
| 3237.9311 | 3238.0476 | 3243.5336 |
| 3243.6346 | 3347.8384 | 3347.8896 |
| 3351.8649 | 3352.2819 | 3629.9700 |
| 3630.2028 | 3630.7476 | 3631.5030 |

**Table S17: Vibrational frequencies (cm<sup>-1</sup>) of optimized MeCXP-Ti<sub>4</sub>-16H<sub>2</sub>**

|          |          |          |
|----------|----------|----------|
| 16.7783  | 35.2319  | 58.7448  |
| 70.8613  | 75.3797  | 80.0150  |
| 92.0278  | 113.3864 | 115.3154 |
| 117.6588 | 125.3184 | 133.3962 |
| 140.4916 | 155.6974 | 162.5961 |
| 179.4789 | 180.3128 | 187.2738 |
| 190.2962 | 193.5837 | 201.4437 |
| 213.4823 | 227.0733 | 237.7490 |
| 238.2601 | 239.2426 | 249.6603 |
| 254.6908 | 258.2068 | 259.8205 |
| 263.1885 | 265.6368 | 274.1832 |
| 274.3077 | 278.1828 | 279.9416 |
| 283.9653 | 288.4806 | 290.3579 |
| 293.9717 | 297.8626 | 301.2523 |
| 305.7398 | 307.1892 | 313.7088 |
| 316.6270 | 327.0291 | 331.4068 |
| 331.8793 | 340.4230 | 353.3309 |
| 354.4241 | 355.3846 | 357.9546 |
| 362.7989 | 363.5590 | 366.9254 |
| 368.3303 | 380.1922 | 382.3908 |
| 383.8438 | 392.0268 | 394.4450 |
| 394.5713 | 399.4199 | 406.2339 |
| 410.2893 | 413.5832 | 419.5841 |
| 423.6687 | 447.2421 | 449.4473 |
| 452.1113 | 455.4816 | 495.7133 |
| 511.8643 | 512.8079 | 517.5169 |
| 521.6442 | 525.0601 | 532.3096 |
| 538.4387 | 540.5953 | 542.2938 |
| 544.6128 | 556.5488 | 564.2015 |
| 568.1428 | 570.0754 | 577.6431 |

|           |           |           |
|-----------|-----------|-----------|
| 588.8051  | 588.8974  | 590.9245  |
| 592.1714  | 598.1014  | 599.6986  |
| 602.7717  | 603.3205  | 616.4452  |
| 620.2315  | 623.9820  | 626.7415  |
| 632.1998  | 633.1302  | 642.0829  |
| 643.0128  | 671.8340  | 679.8853  |
| 680.6509  | 684.0451  | 697.7473  |
| 702.2064  | 703.2036  | 714.1955  |
| 721.3140  | 722.2123  | 735.0292  |
| 735.0773  | 777.8626  | 779.3107  |
| 825.5865  | 826.9805  | 838.5113  |
| 839.0183  | 844.5159  | 846.1414  |
| 875.3174  | 875.6992  | 878.8759  |
| 879.1357  | 890.9062  | 892.6411  |
| 894.7851  | 900.4187  | 906.7456  |
| 915.3784  | 917.2119  | 918.0694  |
| 923.2585  | 925.6286  | 933.8502  |
| 935.4847  | 937.5451  | 938.3796  |
| 939.6419  | 941.7766  | 946.5203  |
| 947.7130  | 950.6339  | 951.9180  |
| 954.7063  | 955.0676  | 960.1597  |
| 961.4692  | 990.2464  | 990.3872  |
| 991.9154  | 992.2052  | 994.2949  |
| 995.4941  | 997.6487  | 997.9772  |
| 1003.0511 | 1003.3405 | 1009.1796 |
| 1010.5533 | 1022.9829 | 1023.1499 |
| 1029.8532 | 1030.1430 | 1052.1077 |
| 1058.0618 | 1064.0779 | 1075.5039 |
| 1084.5557 | 1096.9642 | 1105.4782 |
| 1121.6387 | 1123.0933 | 1142.2138 |
| 1143.0333 | 1146.6251 | 1157.6206 |
| 1160.7830 | 1161.0875 | 1175.5387 |
| 1190.0890 | 1213.2997 | 1218.9655 |
| 1222.1993 | 1228.2711 | 1231.6814 |
| 1236.8548 | 1248.4196 | 1257.0150 |
| 1257.6466 | 1258.8906 | 1259.9182 |
| 1344.1168 | 1344.1868 | 1349.0217 |
| 1349.7590 | 1355.9591 | 1359.1114 |
| 1359.3774 | 1365.4595 | 1371.0626 |
| 1375.8298 | 1376.0230 | 1384.0964 |
| 1384.4193 | 1386.7778 | 1387.0741 |
| 1389.1448 | 1418.0334 | 1418.0644 |
| 1428.0871 | 1428.2361 | 1449.0332 |
| 1449.1244 | 1450.6845 | 1450.9652 |
| 1456.2102 | 1456.3461 | 1457.2889 |
| 1457.7211 | 1459.6597 | 1459.7679 |
| 1469.2715 | 1469.3667 | 1472.9238 |
| 1474.8293 | 1476.6459 | 1478.9979 |
| 1487.0463 | 1487.4838 | 1490.4131 |
| 1494.1783 | 1498.9885 | 1501.5746 |
| 1504.4034 | 1506.1265 | 1514.8999 |

|           |           |           |
|-----------|-----------|-----------|
| 1519.4948 | 1521.9799 | 1525.0199 |
| 1554.6932 | 1555.2443 | 1556.9031 |
| 1558.4430 | 1561.2072 | 1561.3315 |
| 1570.5565 | 1570.7258 | 1591.6240 |
| 1591.8860 | 1600.5332 | 1600.7423 |
| 3010.9819 | 3011.2527 | 3012.2519 |
| 3012.7758 | 3033.4340 | 3033.4459 |
| 3036.2120 | 3036.2273 | 3094.3843 |
| 3094.3860 | 3096.0356 | 3096.1285 |
| 3112.1589 | 3112.1656 | 3115.7694 |
| 3115.7751 | 3124.7955 | 3124.8214 |
| 3132.1804 | 3132.2522 | 3140.3427 |
| 3140.4264 | 3141.5750 | 3141.6374 |
| 3155.9710 | 3156.1794 | 3175.3866 |
| 3175.5704 | 3212.4779 | 3212.7436 |
| 3218.4335 | 3218.7666 | 3242.6267 |
| 3243.2825 | 3244.8653 | 3245.4576 |
| 3364.5630 | 3364.6288 | 3374.4674 |
| 3374.7569 | 3408.9782 | 3409.1585 |
| 3424.0624 | 3424.1855 | 3625.0305 |
| 3625.2065 | 3635.0638 | 3635.2514 |

**Coordinates of optimized geometries of Ti decorated Octmethylcalix[4]pyrrole (MeCXP), calix[4]pyrrole (CXP) and their H<sub>2</sub> Trapped analogues**

**Table S18: Optimized Structure of CXP system (C<sub>20</sub>H<sub>20</sub>N<sub>4</sub>)**

|   |             |             |             |
|---|-------------|-------------|-------------|
| C | 0.71267000  | 3.71374400  | 0.90271600  |
| C | 1.13692100  | 2.92800100  | -0.14403000 |
| C | -1.13692100 | 2.92800100  | -0.14403000 |
| C | -0.71267000 | 3.71374400  | 0.90271600  |
| C | -2.51929900 | 2.51929900  | -0.57765300 |
| C | -2.92800100 | 1.13692100  | -0.14403000 |
| C | -3.71374400 | 0.71267000  | 0.90271600  |
| C | -3.71374400 | -0.71267000 | 0.90271600  |
| C | -2.92800100 | -1.13692100 | -0.14403000 |
| C | -2.51929900 | -2.51929900 | -0.57765300 |
| C | -1.13692100 | -2.92800100 | -0.14403000 |
| C | -0.71267000 | -3.71374400 | 0.90271600  |
| C | 0.71267000  | -3.71374400 | 0.90271600  |
| C | 1.13692100  | -2.92800100 | -0.14403000 |
| C | 2.51929900  | 2.51929900  | -0.57765300 |
| C | 2.92800100  | 1.13692100  | -0.14403000 |
| C | 3.71374400  | 0.71267000  | 0.90271600  |
| C | 3.71374400  | -0.71267000 | 0.90271600  |
| C | 2.92800100  | -1.13692100 | -0.14403000 |
| C | 2.51929900  | -2.51929900 | -0.57765300 |
| H | -1.35822600 | 4.22080400  | 1.60365800  |
| H | 1.35822600  | 4.22080400  | 1.60365800  |

|   |             |             |             |
|---|-------------|-------------|-------------|
| H | -4.22080400 | 1.35822600  | 1.60365800  |
| H | -4.22080400 | -1.35822600 | 1.60365800  |
| H | -1.35822600 | -4.22080400 | 1.60365800  |
| H | 1.35822600  | -4.22080400 | 1.60365800  |
| H | 4.22080400  | 1.35822600  | 1.60365800  |
| H | 4.22080400  | -1.35822600 | 1.60365800  |
| H | -2.61475600 | -2.61475600 | -1.66957600 |
| H | -3.23087700 | -3.23087700 | -0.15480800 |
| H | 3.23087700  | -3.23087700 | -0.15480800 |
| H | 2.61475600  | -2.61475600 | -1.66957600 |
| H | 3.23087700  | 3.23087700  | -0.15480800 |
| H | 2.61475600  | 2.61475600  | -1.66957600 |
| H | -3.23087700 | 3.23087700  | -0.15480800 |
| H | -2.61475600 | 2.61475600  | -1.66957600 |
| N | 0.00000000  | 2.45613000  | -0.77141200 |
| H | 0.00000000  | 1.91874900  | -1.62136800 |
| N | -2.45613000 | 0.00000000  | -0.77141200 |
| H | -1.91874900 | 0.00000000  | -1.62136800 |
| N | 2.45613000  | 0.00000000  | -0.77141200 |
| N | 0.00000000  | -2.45613000 | -0.77141200 |
| H | 0.00000000  | -1.91874900 | -1.62136800 |
| H | 1.91874900  | 0.00000000  | -1.62136800 |

**Table S19: Optimized Structure of CXP-Ti<sub>4</sub> system (C<sub>20</sub>H<sub>20</sub>N<sub>4</sub>Ti<sub>4</sub>)**

|   |             |             |             |
|---|-------------|-------------|-------------|
| C | 0.68578600  | 2.65363400  | 1.47674500  |
| C | 1.18027000  | 2.83746600  | 0.15071200  |
| C | -1.18085300 | 2.83728600  | 0.15064800  |
| C | -0.68641000 | 2.65354400  | 1.47670900  |
| C | -2.54795800 | 2.54063400  | -0.38453600 |
| C | -3.07358000 | 1.16961000  | -0.11758100 |
| C | -3.67445500 | 0.68673700  | 1.08185300  |
| C | -3.67382000 | -0.68584600 | 1.08668600  |
| C | -3.07347600 | -1.17443700 | -0.10974200 |
| C | -2.55124200 | -2.54465800 | -0.38076300 |
| C | -1.17573900 | -2.84244800 | 0.13543000  |
| C | -0.68546900 | -2.68274900 | 1.46788300  |
| C | 0.68614200  | -2.68270000 | 1.46783500  |
| C | 1.17633800  | -2.84233700 | 0.13532200  |
| C | 2.54745900  | 2.54108600  | -0.38439500 |
| C | 3.07332800  | 1.17014100  | -0.11750600 |
| C | 3.67428400  | 0.68730600  | 1.08190200  |
| C | 3.67393600  | -0.68527700 | 1.08663800  |
| C | 3.07370300  | -1.17390900 | -0.10982800 |
| C | 2.55174800  | -2.54421200 | -0.38094700 |
| H | -1.32073300 | 2.66039700  | 2.35387400  |
| H | 1.32006100  | 2.66059600  | 2.35394400  |
| H | -4.19183200 | 1.32394000  | 1.78807600  |
| H | -4.19200900 | -1.31841400 | 1.79655700  |
| H | -1.32116100 | -2.71278000 | 2.34401900  |
| H | 1.32190000  | -2.71265400 | 2.34392400  |

|    |             |             |             |
|----|-------------|-------------|-------------|
| H  | 4.19151700  | 1.32456700  | 1.78817900  |
| H  | 4.19224400  | -1.31778800 | 1.79647300  |
| H  | -2.57673100 | -2.75884400 | -1.45972600 |
| H  | -3.25590600 | -3.25549100 | 0.06987200  |
| H  | 3.25659400  | -3.25494300 | 0.06956700  |
| H  | 2.57719800  | -2.75829000 | -1.45993200 |
| H  | 3.26162200  | 3.25156500  | 0.05239800  |
| H  | 2.56032600  | 2.75584900  | -1.46378100 |
| H  | -3.26228300 | 3.25101200  | 0.05215700  |
| H  | -2.56078300 | 2.75531900  | -1.46393700 |
| N  | -0.00026200 | 2.74943500  | -0.68788500 |
| H  | -0.00022300 | 2.52143800  | -1.67336000 |
| N  | -2.54010600 | -0.00576700 | -0.77635800 |
| H  | -1.68530900 | -0.02091600 | -1.32224100 |
| N  | 2.54010600  | -0.00530100 | -0.77636800 |
| N  | 0.00024200  | -2.58473800 | -0.69539300 |
| H  | 0.00021700  | -3.02856000 | -1.61707400 |
| H  | 1.68535600  | -0.02059800 | -1.32231800 |
| Ti | -0.00043800 | 4.58678100  | 0.20565000  |
| Ti | -4.56023400 | -0.00324100 | -1.05483900 |
| Ti | 0.00043900  | -4.57819300 | 0.20614400  |
| Ti | 4.56023900  | -0.00234900 | -1.05482100 |

**Table S20: Optimized Structure of CXP-Ti<sub>4</sub>-4H<sub>2</sub> system (C<sub>20</sub>H<sub>20</sub>N<sub>4</sub>Ti<sub>4</sub>-H<sub>8</sub>)**

|   |             |             |             |
|---|-------------|-------------|-------------|
| C | -1.56552000 | 2.66842200  | 1.46796900  |
| C | -1.14954400 | 2.97780400  | 0.13376400  |
| C | -2.96054700 | 1.40489800  | 0.11339300  |
| C | -2.61006600 | 1.76092300  | 1.45750100  |
| C | -3.72319700 | 0.19382600  | -0.37058700 |
| C | -3.15021400 | -1.16197700 | -0.03884900 |
| C | -3.07336500 | -1.79349000 | 1.24488500  |
| C | -2.12140500 | -2.79614200 | 1.24148000  |
| C | -1.49994100 | -2.90137900 | -0.04652000 |
| C | -0.17214900 | -3.53204700 | -0.38263100 |
| C | 1.04624400  | -2.79011800 | 0.09810100  |
| C | 1.59905500  | -2.70392800 | 1.35918800  |
| C | 2.79366000  | -1.91388800 | 1.28262600  |
| C | 2.98790300  | -1.45610300 | -0.10311700 |
| C | 0.14348700  | 3.60325900  | -0.33520600 |
| C | 1.43715300  | 2.89081800  | -0.02228900 |
| C | 2.05309100  | 2.69503300  | 1.25680700  |
| C | 2.99161000  | 1.67880000  | 1.19747800  |
| C | 3.06394800  | 1.13367900  | -0.12246900 |
| C | 3.65801600  | -0.18062100 | -0.56558400 |
| H | -3.18988300 | 1.47327700  | 2.32216900  |
| H | -1.20926600 | 3.19381700  | 2.34185200  |
| H | -3.77790200 | -1.60815500 | 2.04258500  |
| H | -1.96848700 | -3.51164500 | 2.03626500  |
| H | 1.20824800  | -3.20007600 | 2.23505400  |
| H | 3.42548900  | -1.63113500 | 2.11107600  |

|    |             |             |             |
|----|-------------|-------------|-------------|
| H  | 1.91087800  | 3.36080800  | 2.09549300  |
| H  | 3.68980400  | 1.43138000  | 1.98344300  |
| H  | -0.09347500 | -3.70117900 | -1.45946300 |
| H  | -0.16344800 | -4.52766300 | 0.06373700  |
| H  | 4.68706700  | -0.20174500 | -0.19844100 |
| H  | 3.74525500  | -0.19127100 | -1.65688100 |
| H  | 0.21238100  | 4.59102500  | 0.12691200  |
| H  | 0.07977000  | 3.79786800  | -1.40959400 |
| H  | -4.72146400 | 0.23164100  | 0.07221300  |
| H  | -3.88592100 | 0.27697400  | -1.44884300 |
| N  | -1.87522000 | 1.99611000  | -0.65296300 |
| H  | -1.91768000 | 2.05964000  | -1.66332700 |
| N  | -2.00334600 | -1.72251200 | -0.72854800 |
| H  | -1.84606500 | -1.56748500 | -1.71615900 |
| N  | 1.92716000  | 1.75274700  | -0.77832300 |
| N  | 1.77364900  | -1.93643100 | -0.73684600 |
| H  | 1.71014600  | -2.03687400 | -1.74050200 |
| H  | 1.78057300  | 1.67302900  | -1.77650600 |
| Ti | -3.23132500 | 3.53847000  | -0.09841500 |
| Ti | -3.53882300 | -3.18527500 | -0.71376300 |
| Ti | 3.43023500  | -3.50724500 | 0.02292000  |
| Ti | 3.48348200  | 3.19850300  | -0.65289900 |
| H  | 4.55969000  | 4.16399100  | 0.35304000  |
| H  | 3.50531700  | 3.30911100  | -2.41525500 |
| H  | -4.03435800 | 4.44126100  | 1.18119300  |
| H  | -3.50818600 | 3.89397500  | -1.80305000 |
| H  | -4.62607200 | -4.19557300 | 0.23023300  |
| H  | -3.56400200 | -3.18322900 | -2.47594900 |
| H  | 2.64644700  | -4.44670400 | -1.24472000 |
| H  | 4.94159800  | -4.16904300 | 0.62201500  |

**Table S21: Optimized Structure of CXP-Ti<sub>4</sub>-8H<sub>2</sub> system (C<sub>20</sub>H<sub>20</sub>N<sub>4</sub>Ti<sub>4</sub>-H<sub>16</sub>)**

|   |             |             |             |
|---|-------------|-------------|-------------|
| C | 3.51234600  | -1.20411000 | 1.08935000  |
| C | 2.87836800  | -1.63454600 | -0.11879600 |
| C | 3.18530600  | 0.70965900  | -0.12775300 |
| C | 3.69775500  | 0.16229000  | 1.07921100  |
| C | 2.92150000  | 2.14017000  | -0.45665500 |
| C | 1.65924300  | 2.70405400  | 0.12027600  |
| C | 1.24755700  | 2.70062200  | 1.49234800  |
| C | -0.11930800 | 2.84727300  | 1.59242800  |
| C | -0.69068600 | 2.94947000  | 0.29602600  |
| C | -2.12100900 | 2.85516400  | -0.12397600 |
| C | -2.76501900 | 1.54091900  | 0.14874400  |
| C | -3.66000000 | 1.16898200  | 1.12184800  |
| C | -4.01154700 | -0.19453700 | 0.96889100  |
| C | -3.23349500 | -0.72769000 | -0.11263100 |
| C | 2.12796800  | -2.90599600 | -0.34373800 |
| C | 0.72654500  | -2.92193800 | 0.17903200  |
| C | 0.24066400  | -2.65072400 | 1.48706800  |
| C | -1.12881300 | -2.48933000 | 1.45563700  |



|    |             |             |             |
|----|-------------|-------------|-------------|
| C  | -1.62883800 | -2.65751600 | 0.12397600  |
| C  | -2.91600800 | -2.14405900 | -0.45228800 |
| H  | 4.26809500  | 0.73657800  | 1.79649800  |
| H  | 3.91387900  | -1.89428000 | 1.82081600  |
| H  | 1.94740300  | 2.71427300  | 2.31842800  |
| H  | -0.68324500 | 2.99268100  | 2.50357100  |
| H  | -4.11568800 | 1.86796900  | 1.81191100  |
| H  | -4.63496300 | -0.77605700 | 1.63222400  |
| H  | 0.85814500  | -2.69195600 | 2.37363000  |
| H  | -1.77353300 | -2.37749700 | 2.31817800  |
| H  | -2.21854500 | 3.10198300  | -1.18972500 |
| H  | -2.68497800 | 3.62698000  | 0.41181500  |
| H  | -3.75288400 | -2.75071500 | -0.08935900 |
| H  | -2.90884000 | -2.30352100 | -1.53980300 |
| H  | 2.69266100  | -3.70534700 | 0.15148100  |
| H  | 2.11995200  | -3.17397600 | -1.40845800 |
| H  | 3.77552200  | 2.71206500  | -0.07555500 |
| H  | 2.93063000  | 2.30199000  | -1.54301200 |
| N  | 2.49514400  | -0.39098800 | -0.75024200 |
| H  | 2.07473900  | -0.34362000 | -1.67112000 |
| N  | 0.39879500  | 2.61615000  | -0.59698600 |
| H  | 0.34750900  | 2.81261000  | -1.59504700 |
| N  | -0.41464100 | -2.67866400 | -0.67445300 |
| N  | -2.48591300 | 0.39040500  | -0.62607800 |
| H  | -1.66374300 | 0.31292100  | -1.21038300 |
| H  | -0.42899400 | -2.98384800 | -1.64568400 |
| Ti | 4.53784800  | -0.64436600 | -1.03962900 |
| Ti | 0.64488400  | 4.57710000  | 0.08396000  |
| Ti | -4.55928600 | 0.51538600  | -1.11261100 |
| Ti | -0.63152800 | -4.53865500 | 0.25451600  |
| H  | 0.38367900  | -5.29981300 | 1.44476500  |
| H  | -0.68237700 | -5.35526000 | -1.32648300 |
| H  | 5.86102100  | 0.32928000  | -0.46932000 |
| H  | 4.33682200  | -0.70796300 | -2.80805100 |
| H  | -0.29477100 | 5.48482500  | 1.23194900  |
| H  | 0.67123400  | 5.18616900  | -1.58648800 |
| H  | -4.09782100 | 1.84935100  | -2.13802000 |
| H  | -5.49894300 | -0.69994200 | -1.99492800 |
| H  | -5.63610400 | 1.95823100  | -0.61169300 |
| H  | -5.97052800 | 1.35435800  | -0.15035600 |
| H  | -2.12242300 | -4.97144100 | 1.34546800  |
| H  | -1.47493600 | -5.10963100 | 1.84126200  |
| H  | 5.47590300  | -2.18821200 | -0.45640300 |
| H  | 5.88526100  | -1.56438700 | -0.09840700 |
| H  | 2.20114000  | 5.14828800  | 1.00661900  |
| H  | 1.58867000  | 5.35141200  | 1.52283700  |

**Table S22: Optimized Structure of CXP-Ti<sub>4</sub>-12H<sub>2</sub> system (C<sub>20</sub>H<sub>20</sub>N<sub>4</sub>Ti<sub>4</sub>-H<sub>24</sub>)**

|   |            |             |            |
|---|------------|-------------|------------|
| C | 3.59990600 | -0.48689900 | 1.25091000 |
| C | 3.06459400 | -1.00210200 | 0.04450300 |

|    |             |             |             |
|----|-------------|-------------|-------------|
| C  | 2.93753900  | 1.33599800  | 0.04055800  |
| C  | 3.52989100  | 0.90185900  | 1.24308300  |
| C  | 2.39970900  | 2.67910200  | -0.32126300 |
| C  | 1.01360000  | 2.95492900  | 0.16287000  |
| C  | 0.52119300  | 3.09252000  | 1.48373000  |
| C  | -0.86668300 | 3.02816400  | 1.48257800  |
| C  | -1.33075200 | 2.82986100  | 0.16324300  |
| C  | -2.68053300 | 2.39646100  | -0.31302200 |
| C  | -3.06458000 | 1.00207000  | 0.04461300  |
| C  | -3.60012100 | 0.48683200  | 1.25089900  |
| C  | -3.53012000 | -0.90192900 | 1.24302000  |
| C  | -2.93755600 | -1.33600700 | 0.04058000  |
| C  | 2.68051300  | -2.39648100 | -0.31314700 |
| C  | 1.33073500  | -2.82986300 | 0.16314300  |
| C  | 0.86670100  | -3.02815200 | 1.48249600  |
| C  | -0.52117600 | -3.09250900 | 1.48368600  |
| C  | -1.01361500 | -2.95493200 | 0.16284000  |
| C  | -2.39973100 | -2.67910200 | -0.32127200 |
| H  | 3.96535700  | 1.56987000  | 1.97303500  |
| H  | 4.09312600  | -1.09512300 | 1.99761200  |
| H  | 1.14526900  | 3.32852400  | 2.33578900  |
| H  | -1.51691400 | 3.20569600  | 2.32781000  |
| H  | -4.09346400 | 1.09503000  | 1.99754200  |
| H  | -3.96573400 | -1.56996800 | 1.97285700  |
| H  | 1.51695100  | -3.20567900 | 2.32771300  |
| H  | -1.14523100 | -3.32850200 | 2.33576300  |
| H  | -2.76567600 | 2.53568200  | -1.39967900 |
| H  | -3.42895400 | 3.06877100  | 0.12298500  |
| H  | -3.07679500 | -3.43122000 | 0.09935000  |
| H  | -2.43391100 | -2.84360000 | -1.40693700 |
| H  | 3.42893400  | -3.06880600 | 0.12283800  |
| H  | 2.76564000  | -2.53569400 | -1.39980600 |
| H  | 3.07677700  | 3.43120700  | 0.09937500  |
| H  | 2.43389200  | 2.84362800  | -1.40692500 |
| N  | 2.56502300  | 0.14355600  | -0.65323000 |
| H  | 1.95710600  | 0.10501200  | -1.45799100 |
| N  | -0.14340500 | 2.61310100  | -0.61840600 |
| H  | -0.13502400 | 2.72208500  | -1.63103100 |
| N  | 0.14336700  | -2.61309900 | -0.61847400 |
| N  | -2.56498000 | -0.14355400 | -0.65317100 |
| H  | -1.95623400 | -0.10495000 | -1.45730400 |
| H  | 0.13495600  | -2.72215200 | -1.63109400 |
| Ti | 4.67846200  | 0.22228700  | -0.73245300 |
| Ti | -0.23963400 | 4.70060400  | -0.06559100 |
| Ti | -4.67834300 | -0.22224000 | -0.73271600 |
| Ti | 0.23961400  | -4.70060400 | -0.06563000 |
| H  | 1.32797700  | -5.72440400 | 0.85932500  |
| H  | -0.83527200 | -5.13790600 | -1.39647500 |
| H  | 5.92373000  | 1.32944200  | -0.17148600 |
| H  | 4.75952500  | -0.85596600 | -2.12918600 |
| H  | -1.32795900 | 5.72443100  | 0.85938000  |

|   |             |             |             |
|---|-------------|-------------|-------------|
| H | 0.83520400  | 5.13787500  | -1.39648700 |
| H | -4.75944600 | 0.85605500  | -2.12941600 |
| H | -5.92364600 | -1.32946000 | -0.17197300 |
| H | -5.71759700 | 1.27972900  | -0.25961500 |
| H | -6.01591200 | 0.70229200  | 0.24602000  |
| H | -1.25376200 | -5.57179500 | 0.69939400  |
| H | -0.67104100 | -5.71950100 | 1.25973800  |
| H | 5.71758700  | -1.27970700 | -0.25919200 |
| H | 6.01591300  | -0.70225300 | 0.24642500  |
| H | 1.25377600  | 5.57179700  | 0.69936600  |
| H | 0.67107200  | 5.71952300  | 1.25972200  |
| H | 4.31295200  | 1.13610800  | -2.33820600 |
| H | 4.54767200  | 1.74518700  | -1.82806400 |
| H | -1.76611600 | 4.86984600  | -1.15281200 |
| H | -1.15095700 | 4.84015500  | -1.70967400 |
| H | -4.54744000 | -1.74513100 | -1.82833800 |
| H | -4.31257100 | -1.13607400 | -2.33841900 |
| H | 1.15088000  | -4.84017800 | -1.70974500 |
| H | 1.76605800  | -4.86985400 | -1.15290400 |

**Table S23: Optimized Structure of CXP-Ti<sub>4</sub>-16H<sub>2</sub> system (C<sub>20</sub>H<sub>20</sub>N<sub>4</sub>Ti<sub>4</sub>-H<sub>32</sub>)**

|   |             |             |             |
|---|-------------|-------------|-------------|
| C | -3.59696000 | 0.28110200  | 1.26157700  |
| C | -3.13976300 | 0.82367200  | 0.03542600  |
| C | -2.84157300 | -1.49770800 | 0.04506600  |
| C | -3.43260100 | -1.09983500 | 1.25952900  |
| C | -2.21935700 | -2.80395400 | -0.31723800 |
| C | -0.81949800 | -2.99574900 | 0.16695400  |
| C | -0.32509600 | -3.07767800 | 1.48861200  |
| C | 1.05907400  | -2.94559400 | 1.48894700  |
| C | 1.51022200  | -2.74392700 | 0.16606700  |
| C | 2.83375300  | -2.23932500 | -0.31403800 |
| C | 3.13976200  | -0.82367200 | 0.03543400  |
| C | 3.59699300  | -0.28105800 | 1.26155300  |
| C | 3.43263300  | 1.09987900  | 1.25945800  |
| C | 2.84157100  | 1.49770400  | 0.04499500  |
| C | -2.83375500 | 2.23931600  | -0.31409000 |
| C | -1.51022700 | 2.74393100  | 0.16600300  |
| C | -1.05906300 | 2.94562600  | 1.48887200  |
| C | 0.32510700  | 3.07771300  | 1.48852500  |
| C | 0.81950500  | 2.99575900  | 0.16686400  |
| C | 2.21935500  | 2.80394100  | -0.31734300 |
| H | -3.78821000 | -1.79051400 | 2.01082400  |
| H | -4.10660000 | 0.85908400  | 2.02134000  |
| H | -0.93834700 | -3.32576000 | 2.34530300  |
| H | 1.71523900  | -3.05791800 | 2.34012100  |
| H | 4.10665500  | -0.85901100 | 2.02132400  |
| H | 3.78826100  | 1.79058800  | 2.01071600  |
| H | -1.71522100 | 3.05797700  | 2.34004700  |
| H | 0.93836300  | 3.32581800  | 2.34520400  |
| H | 2.92758100  | -2.37923100 | -1.39981900 |

|    |             |             |             |
|----|-------------|-------------|-------------|
| H  | 3.61848700  | -2.86537000 | 0.12764600  |
| H  | 2.84847100  | 3.59720000  | 0.10264900  |
| H  | 2.24251200  | 2.96862200  | -1.40329800 |
| H  | -3.61848900 | 2.86537400  | 0.12757700  |
| H  | -2.92758500 | 2.37919600  | -1.39987400 |
| H  | -2.84846300 | -3.59720200 | 0.10278900  |
| H  | -2.24252800 | -2.96866600 | -1.40318800 |
| N  | -2.58115100 | -0.28984200 | -0.66589000 |
| H  | -2.02502300 | -0.21331200 | -1.50423200 |
| N  | 0.31634500  | -2.60940600 | -0.61918400 |
| H  | 0.31631800  | -2.76323300 | -1.62634600 |
| N  | -0.31635900 | 2.60945900  | -0.61924700 |
| N  | 2.58114500  | 0.28981600  | -0.66592100 |
| H  | 2.02491100  | 0.21323300  | -1.50418700 |
| H  | -0.31630300 | 2.76282100  | -1.62645800 |
| Ti | -4.69507400 | -0.52100400 | -0.67165300 |
| Ti | 0.53149300  | -4.68976400 | -0.00543800 |
| Ti | 4.69505700  | 0.52097500  | -0.67174000 |
| Ti | -0.53148700 | 4.68977400  | -0.00556100 |
| H  | -1.68985800 | 5.50482000  | 1.04073000  |
| H  | 0.61142500  | 5.07411600  | -1.29360400 |
| H  | -5.74152100 | -1.72508500 | 0.07556200  |
| H  | -4.73155400 | 0.62221600  | -2.01556000 |
| H  | 1.68984100  | -5.50481100 | 1.04087100  |
| H  | -0.61147900 | -5.07411800 | -1.29342000 |
| H  | 4.73151600  | -0.62228800 | -2.01561100 |
| H  | 5.74150600  | 1.72510400  | 0.07539500  |
| H  | 5.78194900  | -0.94314000 | -0.14294500 |
| H  | 6.02516600  | -0.36275200 | 0.38477700  |
| H  | 0.91521100  | 5.60138500  | 0.83394800  |
| H  | 0.33072700  | 5.66300200  | 1.40414800  |
| H  | -5.78197200 | 0.94311600  | -0.14286400 |
| H  | -6.02517000 | 0.36273300  | 0.38487000  |
| H  | -0.91516400 | -5.60139500 | 0.83415100  |
| H  | -0.33066300 | -5.66296900 | 1.40433100  |
| H  | -4.25677200 | -1.43077000 | -2.27002000 |
| H  | -4.42979200 | -2.04965600 | -1.74390100 |
| H  | 2.07400700  | -4.71411700 | -1.08425700 |
| H  | 1.46267900  | -4.74497100 | -1.64975800 |
| H  | 4.42976400  | 2.04959800  | -1.74403000 |
| H  | 4.25672200  | 1.43069900  | -2.27012400 |
| H  | -1.46261900 | 4.74493300  | -1.64989800 |
| H  | -2.07397300 | 4.71411800  | -1.08442000 |
| H  | 6.20913600  | 0.44399000  | -1.91814400 |
| H  | 6.44144700  | 1.02278700  | -1.40219300 |
| H  | -0.44800600 | 6.48760600  | -0.79188900 |
| H  | -1.02317500 | 6.57480400  | -0.23064000 |
| H  | -6.20917700 | -0.44406400 | -1.91803600 |
| H  | -6.44147700 | -1.02284400 | -1.40206200 |
| H  | 0.44798700  | -6.48759100 | -0.79176100 |
| H  | 1.02315800  | -6.57480000 | -0.23051600 |

**Table S24: Optimized Structure of MeCXP (C<sub>28</sub>H<sub>36</sub>N<sub>4</sub>)**

|   |             |             |             |
|---|-------------|-------------|-------------|
| C | -0.36384900 | -3.58704800 | -1.24992500 |
| N | 0.23818100  | -2.45195100 | 0.57862800  |
| H | 0.23292100  | -2.46872100 | 1.73436200  |
| C | 1.05464000  | -3.43901400 | -1.25076500 |
| C | 1.41183300  | -2.76859700 | -0.10942400 |
| C | -0.84751400 | -2.98823700 | -0.10826500 |
| C | 2.79301700  | -2.28086900 | 0.28860500  |
| C | 3.01909000  | -2.36045200 | 1.81515100  |
| H | 4.01905600  | -2.00378500 | 2.05901700  |
| H | 2.92152700  | -3.40574400 | 2.16455800  |
| H | 2.30139700  | -1.74371300 | 2.38601500  |
| C | 3.84422700  | -3.17139600 | -0.39435100 |
| H | 3.78897000  | -3.10690800 | -1.48662200 |
| H | 3.69729900  | -4.22162200 | -0.09919800 |
| H | 4.85873600  | -2.85623800 | -0.09544200 |
| C | -3.83270200 | 0.35531700  | -1.15249100 |
| N | -2.38760200 | -0.25618600 | 0.39873700  |
| H | -1.60006700 | -0.20523000 | 1.08252800  |
| C | -3.70469200 | -1.06308900 | -1.17793700 |
| C | -2.79790800 | -1.42011600 | -0.19110200 |
| C | -3.00751400 | 0.83910600  | -0.16260700 |
| C | -2.31126500 | -2.77588700 | 0.29093400  |
| C | -2.51652300 | -2.88785500 | 1.81774300  |
| H | -2.21922200 | -3.87891800 | 2.16721200  |
| H | -3.57242400 | -2.71048100 | 2.05241200  |
| H | -1.92541100 | -2.13866100 | 2.37800100  |
| C | -3.17384400 | -3.85516500 | -0.38114800 |
| H | -3.13023200 | -3.78564900 | -1.47355500 |
| H | -4.21472900 | -3.74907900 | -0.09101700 |
| H | -2.82834300 | -4.85264200 | -0.08653900 |
| C | 3.82823200  | -0.32785000 | -1.17093600 |
| N | 2.40156000  | 0.22195200  | 0.41652200  |
| H | 1.68711500  | 0.13696600  | 1.16070500  |
| C | 3.69022700  | 1.09055900  | -1.14588700 |
| C | 2.78896400  | 1.41025000  | -0.15532900 |
| C | 3.01856100  | -0.84897500 | -0.18355000 |
| C | 2.25334200  | 2.75665600  | 0.28728300  |
| C | 2.20234500  | 2.82160100  | 1.83464500  |
| H | 1.77823600  | 3.78639300  | 2.16178200  |
| H | 3.22891900  | 2.73935300  | 2.24658100  |
| H | 1.61805200  | 2.02900200  | 2.29045400  |
| C | 3.16078200  | 3.87399200  | -0.21832500 |
| H | 3.19095200  | 3.88213600  | -1.31085500 |
| H | 4.18428500  | 3.72365300  | 0.15909600  |
| H | 2.79797800  | 4.84520200  | 0.12394800  |
| C | 0.35923300  | 3.72441100  | -1.30339700 |
| N | -0.23019100 | 2.39794800  | 0.35647500  |

|   |             |             |             |
|---|-------------|-------------|-------------|
| H | -0.17964200 | 1.85938400  | 1.21822300  |
| C | -1.05925600 | 3.57639100  | -1.30295400 |
| C | -1.40881200 | 2.75882300  | -0.25704600 |
| C | 0.86053500  | 2.97844300  | -0.25793300 |
| C | -2.72954700 | 2.25369400  | 0.28948700  |
| C | -2.69047000 | 2.30824900  | 1.83673900  |
| H | -3.66607600 | 2.01284700  | 2.25967500  |
| H | -2.44909600 | 3.32527800  | 2.18337400  |
| H | -1.94508200 | 1.63018100  | 2.28189700  |
| C | -3.84538900 | 3.17230600  | -0.19520300 |
| H | -3.88925300 | 3.19337600  | -1.28762800 |
| H | -3.66624600 | 4.19622600  | 0.15718700  |
| H | -4.80957100 | 2.83874700  | 0.18278300  |
| H | 0.94155600  | 4.30465400  | -2.00282500 |
| H | -1.76077700 | 4.04176600  | -1.99189400 |
| H | -4.49219400 | 0.95357300  | -1.78109800 |
| H | -4.26026700 | -1.74967700 | -1.81134500 |
| H | -0.96325200 | -4.03263800 | -2.05263000 |
| H | 1.71917900  | -3.76172100 | -2.05413400 |
| H | 4.19289800  | 1.79006700  | -1.80498200 |
| H | 4.47471600  | -0.90119300 | -1.82465500 |

**Table S25: Optimized Structure of MeCXP-Ti<sub>4</sub> (C<sub>28</sub>H<sub>36</sub>N<sub>4</sub>Ti<sub>4</sub>)**

|   |             |             |             |
|---|-------------|-------------|-------------|
| C | 2.91180700  | 1.26865600  | -1.49135300 |
| N | 2.18030400  | 1.58515000  | 0.62927300  |
| H | 1.82332300  | 1.32480800  | 1.53741900  |
| C | 2.10413000  | 2.37912400  | -1.49106600 |
| C | 1.70248700  | 2.70356300  | -0.16225500 |
| C | 3.09709300  | 0.78644000  | -0.16262200 |
| C | 0.57050500  | 3.61224600  | 0.27138400  |
| C | 0.60201100  | 3.81286200  | 1.78539500  |
| H | -0.19194100 | 4.50328700  | 2.09100000  |
| H | 1.56811400  | 4.22966200  | 2.09081000  |
| H | 0.45715600  | 2.87976500  | 2.34707500  |
| C | 0.78644000  | 4.97780500  | -0.38591000 |
| H | 0.77582700  | 4.91470300  | -1.47894900 |
| H | 1.75694600  | 5.38525200  | -0.08465600 |
| H | -0.01056400 | 5.66492200  | -0.08383200 |
| C | 1.26865600  | -2.91180700 | -1.49135300 |
| N | 1.58515000  | -2.18030400 | 0.62927300  |
| H | 1.32480800  | -1.82332300 | 1.53741900  |
| C | 2.37912400  | -2.10413000 | -1.49106600 |
| C | 2.70356300  | -1.70248700 | -0.16225500 |
| C | 0.78644000  | -3.09709300 | -0.16262200 |
| C | 3.61224600  | -0.57050500 | 0.27138400  |
| C | 3.81286200  | -0.60201100 | 1.78539500  |
| H | 4.50328700  | 0.19194100  | 2.09100000  |
| H | 4.22966200  | -1.56811400 | 2.09081000  |
| H | 2.87976500  | -0.45715600 | 2.34707500  |
| C | 4.97780500  | -0.78644000 | -0.38591000 |

|    |             |             |             |
|----|-------------|-------------|-------------|
| H  | 4.91470300  | -0.77582700 | -1.47894900 |
| H  | 5.38525200  | -1.75694600 | -0.08465600 |
| H  | 5.66492200  | 0.01056400  | -0.08383200 |
| C  | -1.26865600 | 2.91180700  | -1.49135300 |
| N  | -1.58515000 | 2.18030400  | 0.62927300  |
| H  | -1.32480800 | 1.82332300  | 1.53741900  |
| C  | -2.37912400 | 2.10413000  | -1.49106600 |
| C  | -2.70356300 | 1.70248700  | -0.16225500 |
| C  | -0.78644000 | 3.09709300  | -0.16262200 |
| C  | -3.61224600 | 0.57050500  | 0.27138400  |
| C  | -3.81286200 | 0.60201100  | 1.78539500  |
| H  | -4.50328700 | -0.19194100 | 2.09100000  |
| H  | -4.22966200 | 1.56811400  | 2.09081000  |
| H  | -2.87976500 | 0.45715600  | 2.34707500  |
| C  | -4.97780500 | 0.78644000  | -0.38591000 |
| H  | -4.91470300 | 0.77582700  | -1.47894900 |
| H  | -5.38525200 | 1.75694600  | -0.08465600 |
| H  | -5.66492200 | -0.01056400 | -0.08383200 |
| C  | -2.91180700 | -1.26865600 | -1.49135300 |
| N  | -2.18030400 | -1.58515000 | 0.62927300  |
| H  | -1.82332300 | -1.32480800 | 1.53741900  |
| C  | -2.10413000 | -2.37912400 | -1.49106600 |
| C  | -1.70248700 | -2.70356300 | -0.16225500 |
| C  | -3.09709300 | -0.78644000 | -0.16262200 |
| C  | -0.57050500 | -3.61224600 | 0.27138400  |
| C  | -0.60201100 | -3.81286200 | 1.78539500  |
| H  | 0.19194100  | -4.50328700 | 2.09100000  |
| H  | -1.56811400 | -4.22966200 | 2.09081000  |
| H  | -0.45715600 | -2.87976500 | 2.34707500  |
| C  | -0.78644000 | -4.97780500 | -0.38591000 |
| H  | -0.77582700 | -4.91470300 | -1.47894900 |
| H  | -1.75694600 | -5.38525200 | -0.08465600 |
| H  | 0.01056400  | -5.66492200 | -0.08383200 |
| H  | -3.46446200 | -0.90747000 | -2.34850100 |
| H  | -1.93057500 | -3.01673900 | -2.34778100 |
| H  | 0.90747000  | -3.46446200 | -2.34850100 |
| H  | 3.01673900  | -1.93057500 | -2.34778100 |
| H  | 3.46446200  | 0.90747000  | -2.34850100 |
| H  | 1.93057500  | 3.01673900  | -2.34778100 |
| H  | -3.01673900 | 1.93057500  | -2.34778100 |
| H  | -0.90747000 | 3.46446200  | -2.34850100 |
| Ti | -2.76103200 | 3.79659400  | 0.16777600  |
| Ti | 3.79659400  | 2.76103200  | 0.16777600  |
| Ti | 2.76103200  | -3.79659400 | 0.16777600  |
| Ti | -3.79659400 | -2.76103200 | 0.16777600  |

**Table S26: Optimized Structure of MeCXP-Ti<sub>4</sub>-4H<sub>2</sub> (C<sub>28</sub>H<sub>36</sub>N<sub>4</sub>Ti<sub>4</sub>-H<sub>8</sub>)**

|   |            |            |             |
|---|------------|------------|-------------|
| C | 1.45392100 | 2.59540800 | -1.56148400 |
| C | 1.11257200 | 2.95570600 | -0.21961200 |
| C | 2.93308200 | 1.38359300 | -0.24744700 |

|    |             |             |             |
|----|-------------|-------------|-------------|
| C  | 2.50164900  | 1.69043500  | -1.57914200 |
| C  | 3.76533700  | 0.19432000  | 0.23379300  |
| C  | 3.13495300  | -1.14509700 | -0.13856500 |
| C  | 2.94270100  | -1.70708700 | -1.44082100 |
| C  | 1.99472900  | -2.71448900 | -1.40759500 |
| C  | 1.48488800  | -2.89240400 | -0.07946400 |
| C  | 0.18323900  | -3.56655500 | 0.35522300  |
| C  | -1.02259800 | -2.80123400 | -0.18402600 |
| C  | -1.46742000 | -2.64267300 | -1.48583300 |
| C  | -2.64542400 | -1.83710100 | -1.48012900 |
| C  | -2.96970100 | -1.44375800 | -0.10938200 |
| C  | -0.16529000 | 3.62316500  | 0.29547300  |
| C  | -1.43548200 | 2.87369400  | -0.10591100 |
| C  | -1.93237700 | 2.61267900  | -1.42459300 |
| C  | -2.86911500 | 1.59271100  | -1.40606400 |
| C  | -3.06609800 | 1.10589700  | -0.07697700 |
| C  | -3.72091100 | -0.19902800 | 0.36980200  |
| H  | 3.02413400  | 1.37573200  | -2.46935500 |
| H  | 1.05059800  | 3.08180700  | -2.43652600 |
| H  | 3.57133900  | -1.48590300 | -2.28974200 |
| H  | 1.78334100  | -3.38406100 | -2.22725100 |
| H  | -1.01585300 | -3.09910400 | -2.35301400 |
| H  | -3.21876800 | -1.55995300 | -2.35093200 |
| H  | -1.72244200 | 3.23459700  | -2.28122500 |
| H  | -3.48442100 | 1.31145400  | -2.24672500 |
| N  | 1.89961600  | 2.01430200  | 0.55793700  |
| H  | 1.99112600  | 2.10341700  | 1.56086300  |
| N  | 2.05933600  | -1.75607400 | 0.61977300  |
| H  | 1.98713100  | -1.65423300 | 1.62256800  |
| N  | -2.00308000 | 1.77219200  | 0.65455800  |
| N  | -1.83840300 | -1.98619700 | 0.61253700  |
| H  | -1.86014900 | -2.10504100 | 1.61370300  |
| H  | -1.94879600 | 1.73825300  | 1.66315100  |
| Ti | 3.21175500  | 3.52913900  | -0.14819800 |
| Ti | 3.58040600  | -3.21302000 | 0.37668500  |
| Ti | -3.39424900 | -3.50631700 | -0.32018800 |
| Ti | -3.53831400 | 3.20125700  | 0.30350000  |
| H  | -4.47873100 | 4.12611700  | -0.86585700 |
| H  | -3.77055800 | 3.44849000  | 2.03856600  |
| H  | 3.96785100  | 4.32791300  | -1.52506700 |
| H  | 3.63758900  | 3.98855200  | 1.50382500  |
| H  | 4.56519800  | -4.15033900 | -0.74146000 |
| H  | 3.81276300  | -3.36378100 | 2.11871200  |
| H  | -2.91629400 | -4.41788000 | 1.11920500  |
| H  | -4.79432900 | -4.12628300 | -1.18554200 |
| C  | 3.97126500  | 0.27951800  | 1.75932500  |
| C  | 5.14931100  | 0.27026800  | -0.45010700 |
| C  | -0.10044100 | 3.77198300  | 1.82826500  |
| C  | -0.24388700 | 5.03621500  | -0.32890200 |
| C  | -5.14024100 | -0.24372000 | -0.23963800 |
| C  | -3.84931200 | -0.23426600 | 1.90512000  |



|   |             |             |             |
|---|-------------|-------------|-------------|
| C | 0.17649400  | -5.00024600 | -0.22395700 |
| C | 0.12854500  | -3.66767200 | 1.89263300  |
| H | -0.72671200 | -5.51944800 | 0.09532000  |
| H | 0.19733700  | -4.99883900 | -1.31578000 |
| H | 1.05508000  | -5.54201500 | 0.13139100  |
| H | -0.77846400 | -4.19177400 | 2.20012300  |
| H | 0.99402900  | -4.22356900 | 2.25761200  |
| H | 0.14021900  | -2.68565500 | 2.37890800  |
| H | -5.71938500 | 0.61893600  | 0.09394700  |
| H | -5.11733200 | -0.23146800 | -1.33169200 |
| H | -5.64873600 | -1.15845200 | 0.06962100  |
| H | -4.35197600 | -1.15309200 | 2.21733200  |
| H | -2.87567500 | -0.19977400 | 2.40666700  |
| H | -4.43416900 | 0.61623000  | 2.26147800  |
| H | -1.15602000 | 5.53787800  | -0.00183600 |
| H | 0.62116100  | 5.62592100  | -0.02265000 |
| H | -0.25175100 | 5.00034400  | -1.42077700 |
| H | -0.99046600 | 4.28692700  | 2.19533300  |
| H | -0.04404700 | 2.80368300  | 2.33810200  |
| H | 0.77874000  | 4.35244200  | 2.11741800  |
| H | 5.07044000  | 0.26590200  | -1.53954900 |
| H | 5.65462000  | 1.19198500  | -0.15951400 |
| H | 5.76106600  | -0.58313300 | -0.15208100 |
| H | 3.02736600  | 0.21859400  | 2.31265100  |
| H | 4.60461200  | -0.54079100 | 2.10199600  |
| H | 4.44957000  | 1.22496600  | 2.02497200  |

**Table S27: Optimized Structure of MeCXP-Ti<sub>4</sub>-8H<sub>2</sub> (C<sub>28</sub>H<sub>36</sub>N<sub>4</sub>Ti<sub>4</sub>-H<sub>16</sub>)**

|   |             |             |             |
|---|-------------|-------------|-------------|
| C | -0.45693300 | 2.39371800  | -1.70608300 |
| C | -1.16941200 | 2.70181800  | -0.52658600 |
| C | 1.16588600  | 2.80247000  | -0.10325400 |
| C | 0.90829100  | 2.47316200  | -1.47562700 |
| C | 2.45718700  | 2.53496100  | 0.66564200  |
| C | 3.07257600  | 1.23015900  | 0.22007500  |
| C | 3.86993600  | 0.98188700  | -0.94619100 |
| C | 3.81674600  | -0.36197000 | -1.28938800 |
| C | 3.01390600  | -1.04895800 | -0.36920000 |
| C | 2.64118000  | -2.50269500 | -0.23438500 |
| C | 1.16946200  | -2.70170000 | -0.52737200 |
| C | 0.45698300  | -2.39333700 | -1.70680600 |
| C | -0.90824200 | -2.47283100 | -1.47638300 |
| C | -1.16586600 | -2.80244600 | -0.10409300 |
| C | -2.64113700 | 2.50278500  | -0.23369600 |
| C | -3.01385500 | 1.04909600  | -0.36902800 |
| C | -3.81657400 | 0.36237400  | -1.28951900 |
| C | -3.86978200 | -0.98158900 | -0.94673300 |
| C | -3.07257300 | -1.23020100 | 0.21955900  |
| C | -2.45718500 | -2.53510900 | 0.66483300  |
| H | 1.67800200  | 2.42051600  | -2.23413600 |
| H | -0.92381400 | 2.28238600  | -2.67744900 |

|    |             |             |             |
|----|-------------|-------------|-------------|
| H  | 4.49463800  | 1.72355000  | -1.42393000 |
| H  | 4.42573100  | -0.84188300 | -2.04172600 |
| H  | 0.92388300  | -2.28174700 | -2.67813300 |
| H  | -1.67796500 | -2.41996300 | -2.23486600 |
| H  | -4.42545300 | 0.84249200  | -2.04181100 |
| H  | -4.49439600 | -1.72312400 | -1.42478500 |
| N  | -0.15679300 | 2.70320800  | 0.49952900  |
| H  | -0.35462200 | 3.14046400  | 1.39596900  |
| N  | 2.45867500  | -0.05472400 | 0.50287100  |
| H  | 1.59128300  | -0.17661700 | 1.01235800  |
| N  | -2.45874400 | 0.05459900  | 0.50280700  |
| N  | 0.15680200  | -2.70344900 | 0.49872700  |
| H  | 0.35461400  | -3.14089200 | 1.39507400  |
| H  | -1.59162000 | 0.17639500  | 1.01276600  |
| Ti | 0.04627200  | 4.49732300  | -0.79286200 |
| Ti | 4.44386100  | -0.17717600 | 1.05793500  |
| Ti | -0.04633200 | -4.49714100 | -0.79404800 |
| Ti | -4.44400600 | 0.17689900  | 1.05765200  |
| H  | -5.72661600 | 1.18752700  | 0.43425000  |
| H  | -4.33761200 | 0.12271800  | 2.82652800  |
| H  | 0.65478200  | 5.34281900  | -2.22519100 |
| H  | -1.34745000 | 5.18563600  | -0.00467400 |
| H  | 5.72650400  | -1.18760800 | 0.43430300  |
| H  | 4.33751200  | -0.12352100 | 2.82682600  |
| H  | 1.34719900  | -5.18583900 | -0.00585400 |
| H  | -0.65473400 | -5.34208900 | -2.22674000 |
| C  | 2.19402000  | 2.51891000  | 2.16984700  |
| C  | 3.47060800  | 3.63845700  | 0.34900300  |
| C  | -2.98291000 | 2.97895400  | 1.18308700  |
| C  | -3.46550500 | 3.30934200  | -1.23559300 |
| C  | -3.47056400 | -3.63856400 | 0.34793100  |
| C  | -2.19398800 | -2.51941500 | 2.16903200  |
| C  | 3.46562100  | -3.30885800 | -1.23654300 |
| C  | 2.98295700  | -2.97936700 | 1.18223300  |
| H  | 3.24771300  | -4.37142800 | -1.10679100 |
| H  | 3.22795900  | -3.03417400 | -2.27028900 |
| H  | 4.53357600  | -3.13685500 | -1.06935300 |
| H  | 2.68714500  | -4.02447500 | 1.31944100  |
| H  | 4.06873100  | -2.91597700 | 1.32792800  |
| H  | 2.50710800  | -2.37042500 | 1.96198300  |
| H  | -4.45833200 | -3.37682700 | 0.74208000  |
| H  | -3.55213900 | -3.81522300 | -0.73000300 |
| H  | -3.15995400 | -4.58041300 | 0.80648600  |
| H  | -1.78172300 | -3.47820700 | 2.50589100  |
| H  | -1.49640700 | -1.72728200 | 2.46623200  |
| H  | -3.13179400 | -2.34055500 | 2.70344600  |
| H  | -4.53347800 | 3.13753800  | -1.06832300 |
| H  | -3.24736100 | 4.37184200  | -1.10563800 |
| H  | -3.22800600 | 3.03483300  | -2.26942400 |
| H  | -4.06870500 | 2.91571600  | 1.32869300  |
| H  | -2.50723200 | 2.36960200  | 1.96262500  |

|   |             |             |             |
|---|-------------|-------------|-------------|
| H | -2.68690000 | 4.02394600  | 1.32074800  |
| H | 3.55210500  | 3.81544900  | -0.72888200 |
| H | 3.16009900  | 4.58018000  | 0.80788200  |
| H | 4.45839400  | 3.37653400  | 0.74298600  |
| H | 1.49630500  | 1.72683000  | 2.46686700  |
| H | 3.13181400  | 2.33973800  | 2.70417700  |
| H | 1.78195700  | 3.47768900  | 2.50698800  |
| H | 5.51569700  | 1.36781100  | 1.18401200  |
| H | 5.91180800  | 0.91716700  | 0.61501600  |
| H | -5.51575200 | -1.36816200 | 1.18314300  |
| H | -5.91187700 | -0.91733600 | 0.61428400  |
| H | 1.09682500  | 5.14100300  | 0.62189000  |
| H | 0.30619500  | 5.32090700  | 0.84557300  |
| H | -0.30657000 | -5.32116500 | 0.84413000  |
| H | -1.09715300 | -5.14114700 | 0.62039300  |

**Table S28: Optimized Structure of MeCXP-Ti<sub>4</sub>-12H<sub>2</sub> (C<sub>28</sub>H<sub>36</sub>N<sub>4</sub>Ti<sub>4</sub>-H<sub>24</sub>)**

|   |             |             |             |
|---|-------------|-------------|-------------|
| C | -1.38459900 | 2.63361900  | -1.50402500 |
| C | -1.87749200 | 2.49336400  | -0.18951600 |
| C | 0.40334700  | 3.11973300  | -0.13971300 |
| C | -0.04907300 | 3.01863700  | -1.48175500 |
| C | 1.83885900  | 3.11431200  | 0.36441600  |
| C | 2.55496500  | 1.85789100  | -0.09744100 |
| C | 2.89634000  | 1.45312500  | -1.40298900 |
| C | 3.31549300  | 0.12787800  | -1.40424800 |
| C | 3.23692200  | -0.40606800 | -0.08878900 |
| C | 3.17327700  | -1.87228500 | 0.30197100  |
| C | 1.87750400  | -2.49333000 | -0.18964900 |
| C | 1.38476700  | -2.63343700 | -1.50423500 |
| C | 0.04923700  | -3.01845200 | -1.48216900 |
| C | -0.40334200 | -3.11968600 | -0.14020200 |
| C | -3.17333500 | 1.87225600  | 0.30185700  |
| C | -3.23695800 | 0.40608300  | -0.08909100 |
| C | -3.31542200 | -0.12770300 | -1.40462900 |
| C | -2.89622600 | -1.45293500 | -1.40350800 |
| C | -2.55496200 | -1.85786300 | -0.09798100 |
| C | -1.83890700 | -3.11434400 | 0.36378100  |
| H | 0.53879200  | 3.29403600  | -2.34504600 |
| H | -1.99968200 | 2.57424500  | -2.39191600 |
| H | 2.95326700  | 2.12449700  | -2.24925000 |
| H | 3.73399900  | -0.39895900 | -2.24918900 |
| H | 1.99996200  | -2.57393700 | -2.39204100 |
| H | -0.53851900 | -3.29375400 | -2.34556600 |
| H | -3.73388600 | 0.39922700  | -2.24953200 |
| H | -2.95306600 | -2.12420600 | -2.24985400 |
| N | -0.72246900 | 2.67342500  | 0.63828400  |
| H | -0.74757900 | 2.65782400  | 1.64826100  |
| N | 2.64849400  | 0.66023700  | 0.68061000  |
| H | 2.49482900  | 0.62687200  | 1.67886200  |
| N | -2.64851900 | -0.66029700 | 0.68020200  |

|    |             |             |             |
|----|-------------|-------------|-------------|
| N  | 0.72238100  | -2.67350500 | 0.63798800  |
| H  | 0.74735400  | -2.65799100 | 1.64796900  |
| H  | -2.49509500 | -0.62710400 | 1.67849700  |
| Ti | -1.20423900 | 4.59375100  | -0.18079800 |
| Ti | 4.65934800  | 1.21961700  | 0.16791700  |
| Ti | 1.20426800  | -4.59372000 | -0.18127400 |
| Ti | -4.65932100 | -1.21968400 | 0.16738900  |
| H  | -5.97999200 | -0.42699200 | -0.67711300 |
| H  | -4.85676300 | -2.45256700 | 1.42426700  |
| H  | -0.34002800 | 5.76912600  | -1.16088400 |
| H  | -2.47964900 | 4.98582800  | 0.98395700  |
| H  | 5.97992400  | 0.42706200  | -0.67686500 |
| H  | 4.85693600  | 2.45223900  | 1.42502700  |
| H  | 2.47954300  | -4.98587700 | 0.98359400  |
| H  | 0.34026000  | -5.76897800 | -1.16168100 |
| C  | 1.88068000  | 3.20652800  | 1.88846400  |
| C  | 2.56985300  | 4.32563600  | -0.22353300 |
| C  | -3.28951000 | 2.05706300  | 1.81337800  |
| C  | -4.35269500 | 2.58473300  | -0.36752900 |
| C  | -2.56984900 | -4.32559400 | -0.22439100 |
| C  | -1.88088100 | -3.20675900 | 1.88780900  |
| C  | 4.35274100  | -2.58465400 | -0.36735700 |
| C  | 3.28925400  | -2.05728500 | 1.81348000  |
| H  | 4.40027100  | -3.61818700 | -0.01644000 |
| H  | 4.25290700  | -2.60156700 | -1.45790800 |
| H  | 5.28463800  | -2.06334600 | -0.13142900 |
| H  | 3.17282100  | -3.11711900 | 2.06311700  |
| H  | 4.27142400  | -1.73769500 | 2.16759500  |
| H  | 2.53215000  | -1.48596000 | 2.36864200  |
| H  | -3.59121200 | -4.35836100 | 0.16317600  |
| H  | -2.61312300 | -4.28348400 | -1.31793400 |
| H  | -2.04405700 | -5.24729600 | 0.03434400  |
| H  | -1.44325500 | -4.14691100 | 2.23285200  |
| H  | -1.33250800 | -2.38556700 | 2.37003600  |
| H  | -2.92054700 | -3.16876500 | 2.22681600  |
| H  | -5.28463300 | 2.06342400  | -0.13176800 |
| H  | -4.40023400 | 3.61822800  | -0.01649400 |
| H  | -4.25273400 | 2.60178100  | -1.45806700 |
| H  | -4.27171400 | 1.73739300  | 2.16732300  |
| H  | -2.53245600 | 1.48569700  | 2.36856700  |
| H  | -3.17315500 | 3.11687000  | 2.06316300  |
| H  | 2.61324600  | 4.28365500  | -1.31707700 |
| H  | 2.04402000  | 5.24730200  | 0.03524100  |
| H  | 3.59116800  | 4.35837600  | 0.16415900  |
| H  | 1.33220900  | 2.38531100  | 2.37053700  |
| H  | 2.92030900  | 3.16844200  | 2.22757400  |
| H  | 1.44307000  | 4.14666200  | 2.23357600  |
| H  | 5.12877500  | 2.82828300  | -0.72007700 |
| H  | 5.43137100  | 2.25834400  | -1.22508400 |
| H  | -2.76705900 | 4.95340200  | -1.19102400 |
| H  | -2.17418700 | 5.17263700  | -1.71261600 |

|   |             |             |             |
|---|-------------|-------------|-------------|
| H | -5.12879800 | -2.82815300 | -0.72094100 |
| H | -5.43147800 | -2.25809500 | -1.22576500 |
| H | 2.76725000  | -4.95322200 | -1.19130900 |
| H | 2.17445400  | -5.17239900 | -1.71300800 |
| H | 0.03337200  | 5.33475300  | 1.01094800  |
| H | -0.64218400 | 5.20808900  | 1.48354300  |
| H | 5.25982000  | -0.06569900 | 1.38699700  |
| H | 5.04899600  | 0.58078800  | 1.87124300  |
| H | 0.64203800  | -5.20833600 | 1.48291200  |
| H | -0.03344900 | -5.33498900 | 1.01022100  |
| H | -5.25970200 | 0.06535400  | 1.38681600  |
| H | -5.04885100 | -0.58125200 | 1.87088900  |

**Table S29: Optimized Structure of MeCXP-Ti<sub>4</sub>-16H<sub>2</sub> (C<sub>28</sub>H<sub>36</sub>N<sub>4</sub>Ti<sub>4</sub>-H<sub>32</sub>)**

|   |             |             |             |
|---|-------------|-------------|-------------|
| C | -0.96445800 | 2.81975500  | -1.46278400 |
| C | -1.46305700 | 2.76825100  | -0.14586500 |
| C | 0.88697600  | 3.04725900  | -0.11630200 |
| C | 0.41395600  | 3.00688200  | -1.45482600 |
| C | 2.30897600  | 2.81056900  | 0.37673900  |
| C | 2.81464600  | 1.45585700  | -0.09065000 |
| C | 2.99499400  | 0.98344900  | -1.40535500 |
| C | 3.19319400  | -0.39340900 | -1.40442600 |
| C | 3.11052800  | -0.89051600 | -0.07602400 |
| C | 2.82928800  | -2.32278300 | 0.35316300  |
| C | 1.46301000  | -2.76821600 | -0.14602000 |
| C | 0.96437100  | -2.81983700 | -1.46290700 |
| C | -0.41403600 | -3.00703700 | -1.45487600 |
| C | -0.88701600 | -3.04732300 | -0.11632500 |
| C | -2.82930300 | 2.32276400  | 0.35336200  |
| C | -3.11052700 | 0.89053200  | -0.07593400 |
| C | -3.19298000 | 0.39349200  | -1.40437500 |
| C | -2.99477200 | -0.98336600 | -1.40534600 |
| C | -2.81464400 | -1.45586000 | -0.09063700 |
| C | -2.30899400 | -2.81057600 | 0.37673800  |
| H | 1.03014300  | 3.16869900  | -2.32643800 |
| H | -1.58692300 | 2.84360100  | -2.34721200 |
| H | 3.09803300  | 1.62571400  | -2.26995800 |
| H | 3.45300600  | -0.99160200 | -2.26463300 |
| H | 1.58679200  | -2.84379000 | -2.34736200 |
| H | -1.03023300 | -3.16899600 | -2.32645500 |
| H | -3.45264100 | 0.99173400  | -2.26459300 |
| H | -3.09760100 | -1.62558800 | -2.27000700 |
| N | -0.28731400 | 2.78082400  | 0.66775800  |
| H | -0.31342500 | 2.80788000  | 1.67739400  |
| N | 2.75468200  | 0.26631300  | 0.69993600  |
| H | 2.72597800  | 0.28153200  | 1.71039300  |
| N | -2.75483700 | -0.26635200 | 0.70002700  |
| N | 0.28731000  | -2.78072600 | 0.66765100  |
| H | 0.31347100  | -2.80769400 | 1.67728700  |
| H | -2.72615800 | -0.28160400 | 1.71048100  |

|    |             |             |             |
|----|-------------|-------------|-------------|
| Ti | -0.47371800 | 4.75501600  | -0.18405000 |
| Ti | 4.80524500  | 0.48223300  | 0.03506500  |
| Ti | 0.47371600  | -4.75498300 | -0.18388600 |
| Ti | -4.80524500 | -0.48218700 | 0.03488800  |
| H  | -5.79908100 | 0.55090900  | -0.99119700 |
| H  | -5.05147700 | -1.73449400 | 1.25137200  |
| H  | 0.59487400  | 5.64026600  | -1.27152500 |
| H  | -1.73703900 | 5.12260100  | 0.98971700  |
| H  | 5.79915700  | -0.55068200 | -0.99113800 |
| H  | 5.05132900  | 1.73442400  | 1.25167900  |
| H  | 1.73701800  | -5.12254800 | 0.98991600  |
| H  | -0.59470000 | -5.64028800 | -1.27146100 |
| C  | 2.37277400  | 2.89166700  | 1.90012900  |
| C  | 3.21927900  | 3.89223200  | -0.21243600 |
| C  | -2.88967100 | 2.46723700  | 1.87252500  |
| C  | -3.90172300 | 3.22440600  | -0.26550800 |
| C  | -3.21930200 | -3.89223800 | -0.21244000 |
| C  | -2.37278400 | -2.89171000 | 1.90012400  |
| C  | 3.90166600  | -3.22442400 | -0.26578100 |
| C  | 2.88968100  | -2.46734200 | 1.87231400  |
| H  | 3.75343500  | -4.25018800 | 0.07875300  |
| H  | 3.85714200  | -3.22014900 | -1.36045200 |
| H  | 4.89683400  | -2.87176500 | 0.01590300  |
| H  | 2.64514300  | -3.49755500 | 2.14889100  |
| H  | 3.89353700  | -2.25158100 | 2.24501100  |
| H  | 2.18699000  | -1.79686300 | 2.38546200  |
| H  | -4.23737500 | -3.74912800 | 0.15733800  |
| H  | -3.23826900 | -3.85792100 | -1.30724100 |
| H  | -2.85558800 | -4.88366100 | 0.06562500  |
| H  | -2.08357600 | -3.88586400 | 2.25017800  |
| H  | -1.71382300 | -2.15840500 | 2.38432800  |
| H  | -3.39755900 | -2.70102100 | 2.23278500  |
| H  | -4.89687200 | 2.87171400  | 0.01620200  |
| H  | -3.75350700 | 4.25015700  | 0.07907200  |
| H  | -3.85724200 | 3.22018200  | -1.36018100 |
| H  | -3.89353000 | 2.25149700  | 2.24522400  |
| H  | -2.18700600 | 1.79670000  | 2.38563400  |
| H  | -2.64507600 | 3.49742400  | 2.14915000  |
| H  | 3.23823600  | 3.85792500  | -1.30723700 |
| H  | 2.85559200  | 4.88366300  | 0.06564000  |
| H  | 4.23735400  | 3.74910800  | 0.15732800  |
| H  | 1.71377400  | 2.15838600  | 2.38431100  |
| H  | 3.39754100  | 2.70092300  | 2.23278600  |
| H  | 2.08362300  | 3.88582700  | 2.25021300  |
| H  | 5.43604800  | 1.99518000  | -0.95389300 |
| H  | 5.58734500  | 1.38329300  | -1.47186900 |
| H  | -1.96578200 | 5.29706200  | -1.25350500 |
| H  | -1.34437700 | 5.38968600  | -1.77474700 |
| H  | -5.43600000 | -1.99497400 | -0.95429100 |
| H  | -5.58727500 | -1.38302600 | -1.47221000 |
| H  | 1.96569100  | -5.29706600 | -1.25350700 |

|   |             |             |             |
|---|-------------|-------------|-------------|
| H | 1.34418600  | -5.38969100 | -1.77463700 |
| H | 0.87147100  | 5.23552400  | 1.03524500  |
| H | 0.18094200  | 5.20513800  | 1.50597500  |
| H | 5.17474800  | -0.88523500 | 1.25854600  |
| H | 5.09964300  | -0.20488700 | 1.74205300  |
| H | -0.18082100 | -5.20506800 | 1.50619200  |
| H | -0.87140900 | -5.23547700 | 1.03554800  |
| H | -5.17468500 | 0.88489700  | 1.25886000  |
| H | -5.09957600 | 0.20437100  | 1.74209700  |
| H | 0.91457000  | -6.60765800 | 0.30091300  |
| H | 0.31251300  | -6.70520600 | -0.23304800 |
| H | -6.59505100 | -0.93014800 | 0.70714700  |
| H | -6.75487300 | -0.33891000 | 0.17673600  |
| H | -0.91438700 | 6.60784200  | 0.30057400  |
| H | -0.31233800 | 6.70517600  | -0.23343500 |
| H | 6.59496400  | 0.93017200  | 0.70758100  |
| H | 6.75488200  | 0.33908100  | 0.17704500  |
